# Supplementary material
Source: PubMed Central journal article supplement (PMC3375971)
Supplement: supp_pp.112.193599_193599Supplemental_data.pdf [file supp_pp.112.193599_193599Supplemental_data.pdf]

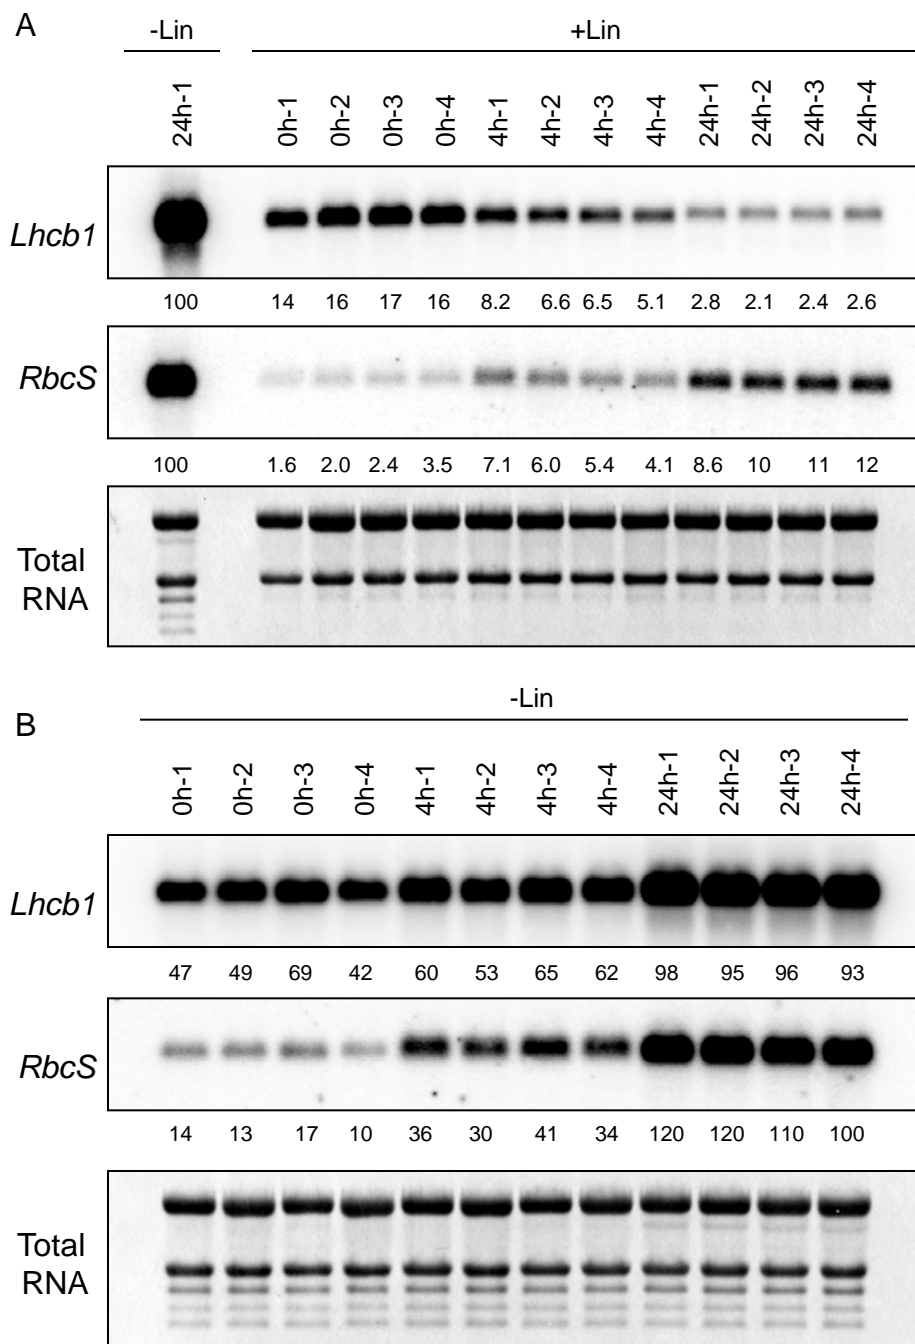

**Supplemental Figure S1.** Expression of *Lhcb1* and *RbcS* following a fluence-rate shift.

**A,** Expression of *Lhcb1* and *RbcS* in lincomycin-treated seedlings after a fluence-rate shift. Seedlings were grown in the presence of lincomycin (+Lin) or in the absence of lincomycin (-Lin) as described in Fig. 1. RNA was extracted and both *Lhcb1* and *RbcS* mRNA levels were quantified with RNA blot hybridizations that utilized 2.5  $\mu\text{g}$  of total RNA. Four biological replicates from each time point were quantified and normalized to total RNA stained with methylene blue. Numbers below each lane indicate the amount of hybridized RNA as a percentage of hybridized RNA in untreated seedlings after 24 h in 60  $\mu\text{mol m}^{-2} \text{s}^{-1}$  BR light.

**B,** Expression of *Lhcb1* and *RbcS* in seedlings not treated with lincomycin following a fluence-rate shift. Seedlings were grown in the absence of lincomycin (-Lin) and the levels of *Lhcb1* mRNA were quantified as in A.

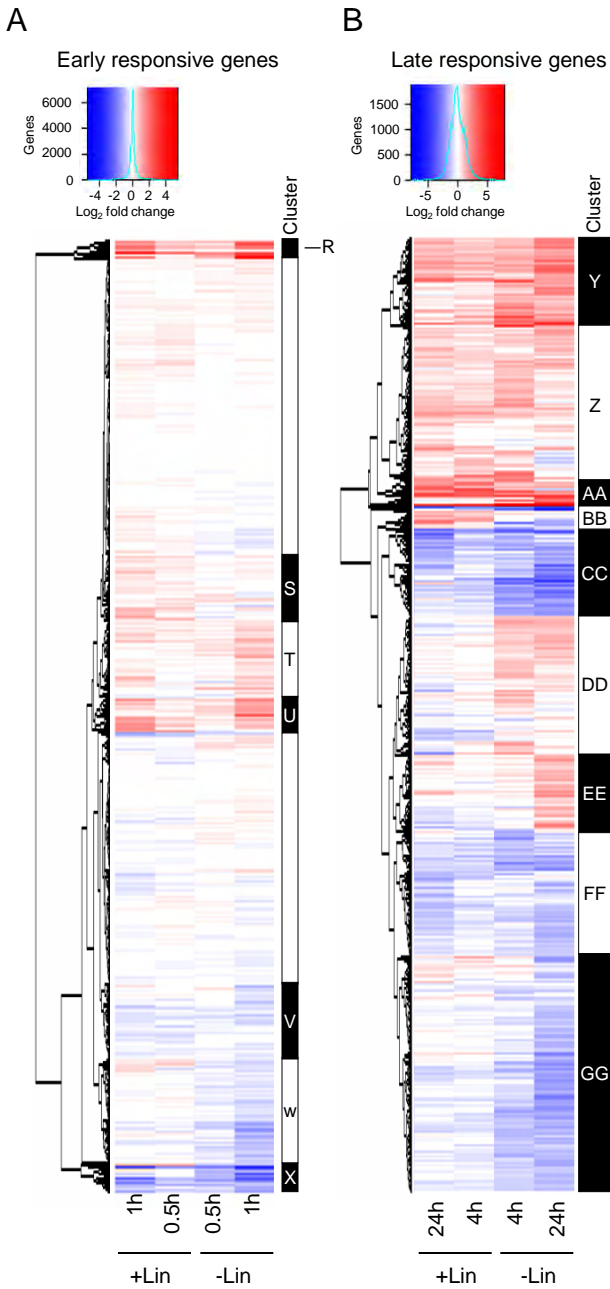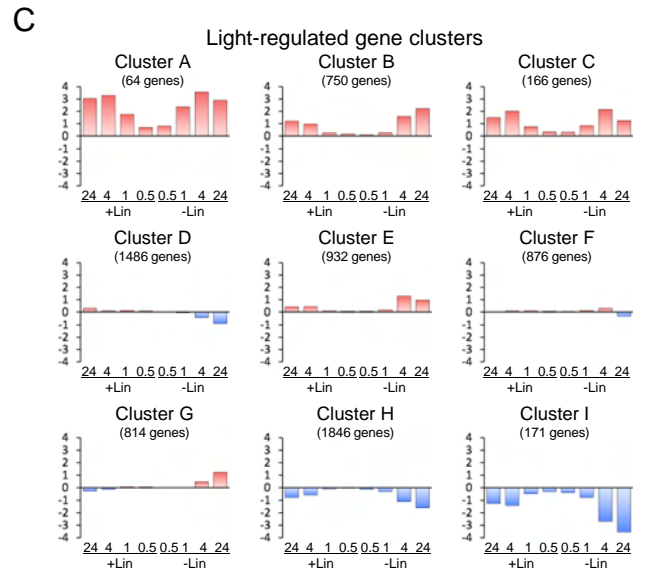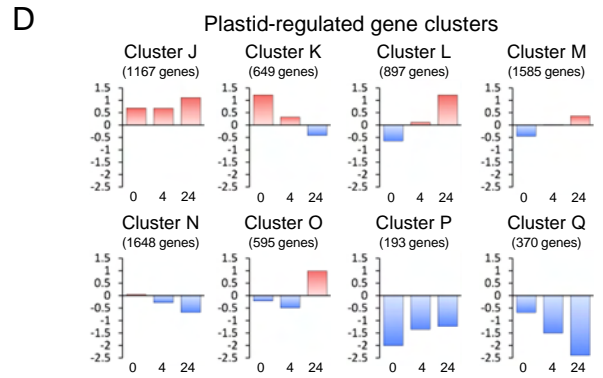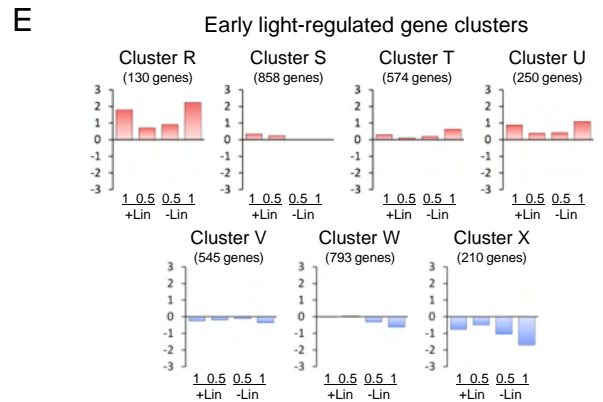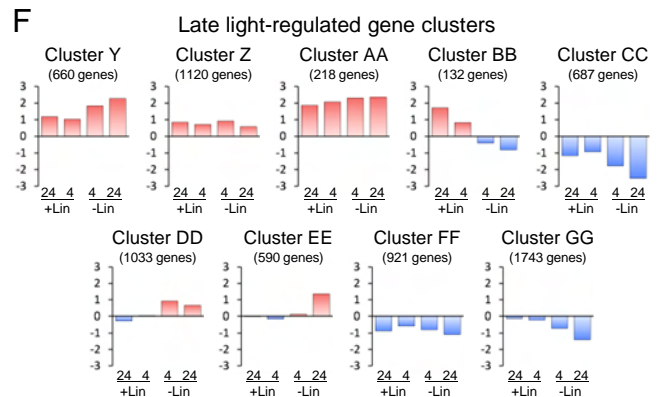

**Supplemental Figure S2.** Agglomerative clustering of early time points (i.e., 0.5 h and 1 h) and late time points (i.e., 4 h and 24 h).

A, Agglomerative hierarchical clustering of the 7104 active gene sets based on their regulation by light at 0.5 h and 1 h in lincomycin-treated and untreated seedlings. Up-regulated expression is indicated with red and down-regulated expression is indicated with blue. Color intensity is proportional to the degree of regulation.

B, Agglomerative hierarchical clustering of the 7104 active gene sets based on their regulation by the light at 4 h and 24 h in lincomycin-treated and untreated seedlings. Data are colored as in A.

C-F, The average gene expression level ( $\log_2$ ) and number of genes represented by each of the clusters from Fig. 2E (C), Fig. 2F (D), Supplemental Fig. S2A (E), and Supplemental Fig. S2B (F).

A

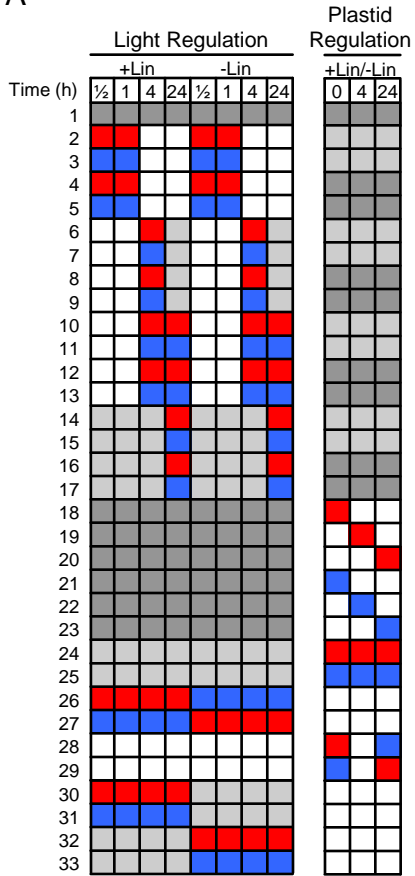

■ Gene is induced  
■ Gene is repressed  
■ Gene is induced or repressed  
■ No significant change in gene expression  
■ Data was not considered

B

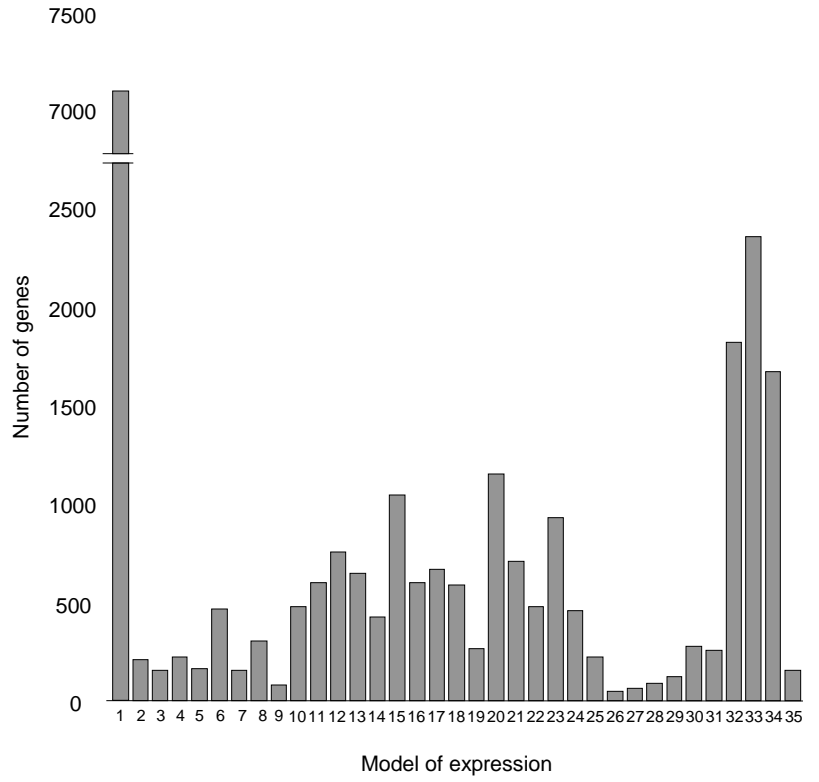

**Supplemental Figure S3.** Distribution of user-defined expression patterns among light- and plastid-regulated genes.

A, Expression patterns of light- and plastid-regulated genes. We defined 33 models of expression that arise from the interactions between light and plastid signaling. Gene expression was described in four possible ways: induced (red); repressed (blue); induced or repressed (dark gray); no significant change (light gray); data were not considered (white). Genes were considered induced (red) or repressed (blue) if the change in expression was greater than twofold ( $p \leq 0.01$ ). The expression patterns were: pattern 1, genes are induced or repressed; patterns 2-5, early-light-responsive genes (i.e., genes are regulated by light only at 0.5 h and 1 h); patterns 6-9, transiently responsive genes (i.e., genes that are regulated by light only at 4 h); patterns 10-13, light induction or repression at 4 h is maintained at 24 h in lincomycin-treated and/or untreated seedlings; patterns 14-17, late-responsive genes (i.e., genes that are regulated by light only at 24 h); patterns 18-25, plastid-responsive genes (i.e., genes that are regulated in lincomycin-treated seedlings at 0 h, 4 h, or at 24 h); patterns 26-27, genes that are oppositely regulated by light at the same time point in lincomycin-treated and untreated seedlings; patterns 28-29, genes that are oppositely regulated in lincomycin-treated and untreated seedlings 24 h after the BR-fluence-rate shift; patterns 30-31, genes that are either induced or repressed by light in lincomycin-treated but not in untreated seedlings; patterns 32-33 genes that are induced or repressed by light in untreated seedlings but not in lincomycin-treated seedlings.

B, Number of genes in each of the expression models described in A. The 33 expression patterns from A and two additional patterns, 34 and 35, are shown. Pattern 34 (positive correlation) describes genes that exhibit a similar response to the BR-fluence-rate shift regardless of whether seedlings are treated with lincomycin. For these genes, the correlation coefficient between the expression patterns in lincomycin-treated and untreated seedlings is greater than 0.95. Pattern 35 (negative correlation) describes genes that have an opposite response to the BR-fluence-rate shift in lincomycin-treated and untreated seedlings. For these genes, the correlation coefficient between the expression pattern in lincomycin-treated and untreated seedlings is less than -0.95.

A

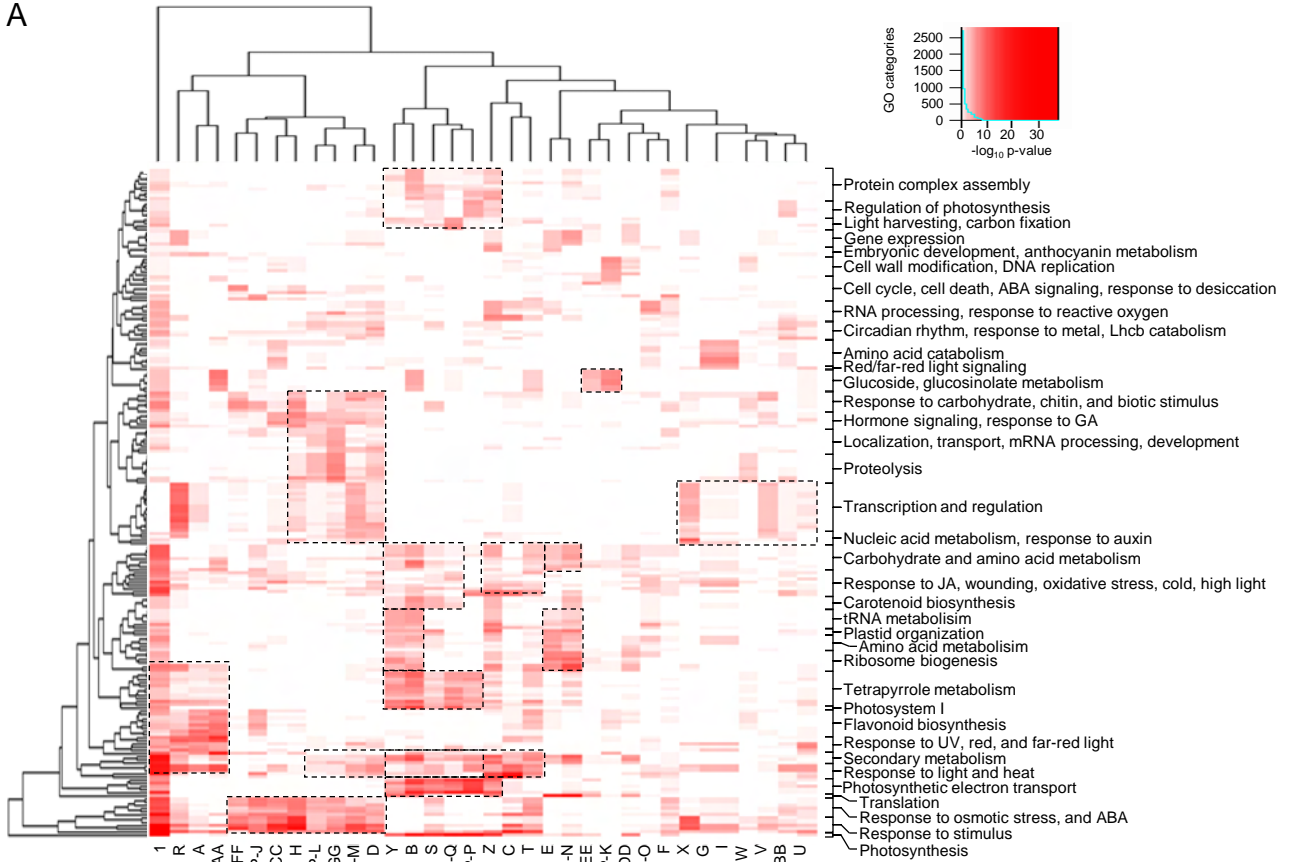

B

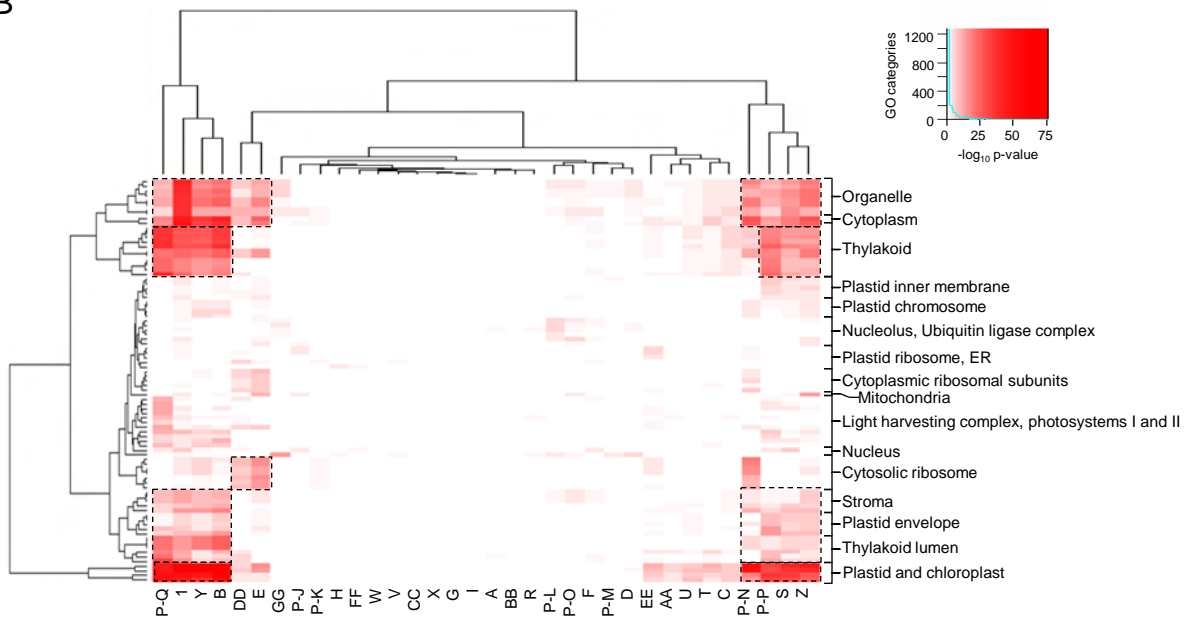

**Supplemental Figure S4.** Agglomerative hierarchical clustering of significantly enriched GO terms with expression clusters.

A, Agglomerative hierarchical clustering of GO terms defined as a biological process with expression clusters. We analyzed 205 GO terms and judged them to be enriched in at least one of the expression clusters if  $p \leq 0.01$  after a Westfall-Young correction. GO terms were included if they were enriched in at least one expression pattern and  $p \leq 0.01$ . The negative  $\log_{10}$  of the uncorrected p-value for each pattern was clustered. Clusters of GO terms are shown as a dendrogram at the left of the cluster matrix. Summary GO terms are shown at the right of the cluster matrix. These summary terms contain a representative group of genes from multiple GO categories. For example, tetrapyrrole metabolism is a summary term that contains a representative group of genes from the following GO categories: tetrapyrrole metabolic process, 0033013; porphyrin metabolic process, 0006778; chlorophyll metabolic process, 0015994; cofactor metabolic process, 0051186; tetrapyrrole biosynthetic process, 0033014; porphyrin biosynthetic process, 0006779; cofactor biosynthetic process, 0051188; chlorophyll biosynthetic process, 0015995. Expression clusters from Fig. 2 and Supplemental Fig. S2 are shown as a dendrogram at the top of the cluster matrix. Names of expression clusters from Fig. 2 and Supplemental Fig. S2 that correspond to each branch of the dendrogram are indicated at the bottom of the cluster matrix. The letter P next to the cluster letter indicates regulation by plastid dysfunction. No letter P next to the cluster letter indicates regulation by the BR-fluence-rate shift. The branch of the dendrogram labeled 1 contains all of the significantly regulated genes in the dataset. The intensity of the red color is proportional to the degree of enrichment. Co-regulated GO terms are indicated with dashed boxes.

B, Agglomerative hierarchical clustering of GO terms defined as cellular components with expression clusters. Eighty-eight GO terms defined as cellular components were enriched as described in A. The labeling of this heat map is as described for A.

A

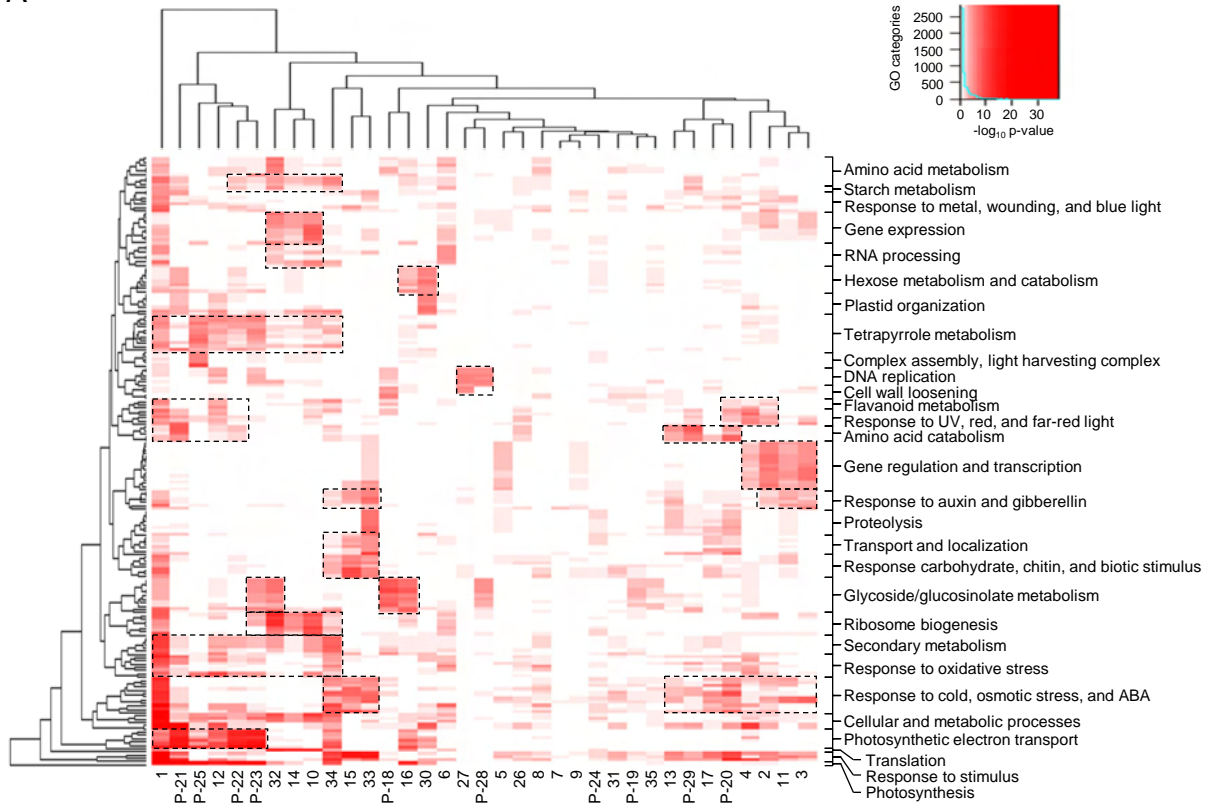

B

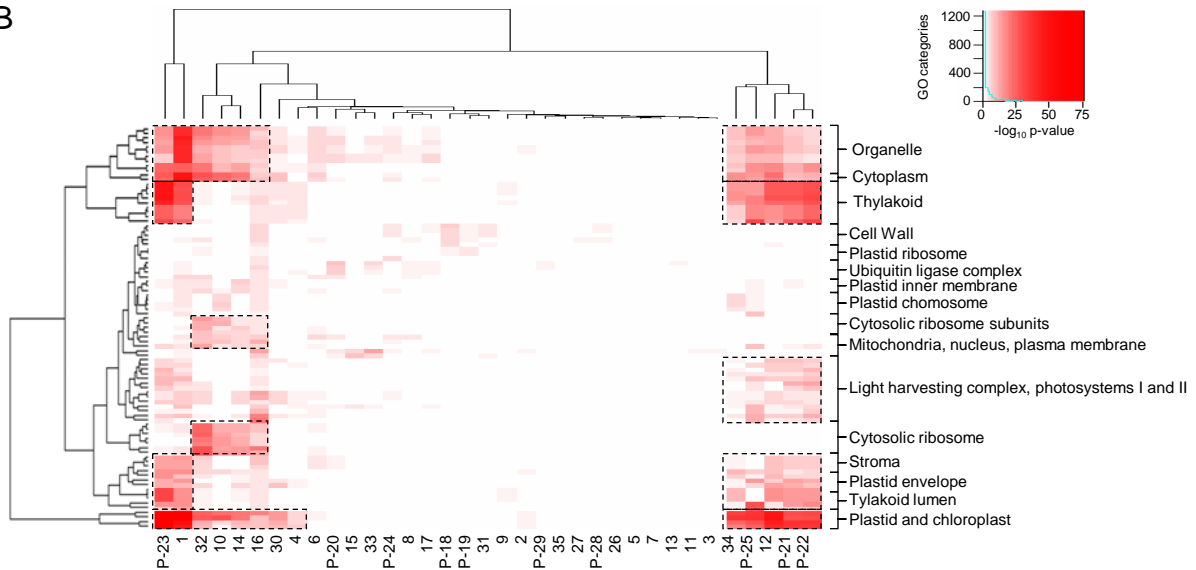



**Supplemental Figure S5.** Clustering of significantly enriched GO terms with user-defined expression patterns.

A, Agglomerative hierarchical clustering of GO terms defined as biological processes with expression patterns. One hundred ninety-eight active GO terms assigned as a biological process were considered enriched if  $p \leq 0.01$  after a Westfall-Young correction of at least one of the expression clusters. GO terms were included if they were enriched in at least one expression pattern and  $p \leq 0.01$ . The negative  $\log_{10}$  of the uncorrected p-values for each pattern was clustered. These one hundred ninety-eight GO clusters are shown as a dendrogram at the left of the cluster matrix. Summary terms that represent a cluster of GO terms are shown at the right of the cluster matrix and are as described in Supplemental Fig. S4A. User-defined expression patterns from Supplemental Fig. S3 are shown as a dendrogram at the top of the cluster matrix. User-defined expression pattern numbers from Supplemental Fig. S3 that correspond to each branch of the dendrogram are indicated at the bottom of the cluster matrix. The letter P next to the cluster number indicates regulation by the lincomycin treatment. No letter P next to the cluster letter indicates regulation by the BR-fluence-rate shift. The intensity of the red color is proportional to the degree of enrichment. Clusters of patterns are indicated with dashed boxes.

B, Agglomerative hierarchical clustering of GO terms defined as cellular components with expression patterns. Eighty-seven GO terms assigned as cellular components were enriched as described in A. Labeling of this heat map is as described in A.



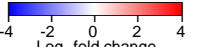

### Regulation of transcription cluster I

GO:0045449 (206/558)

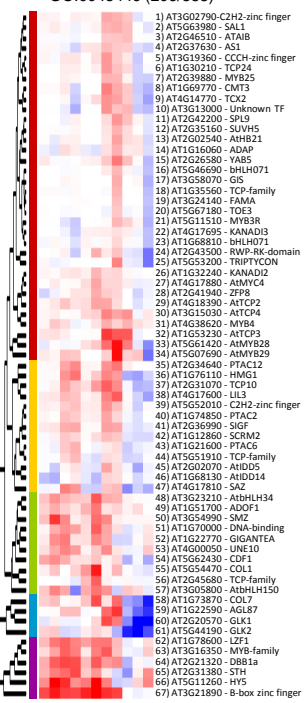

### Regulation of transcription cluster III

GO:0045449 (206/558)

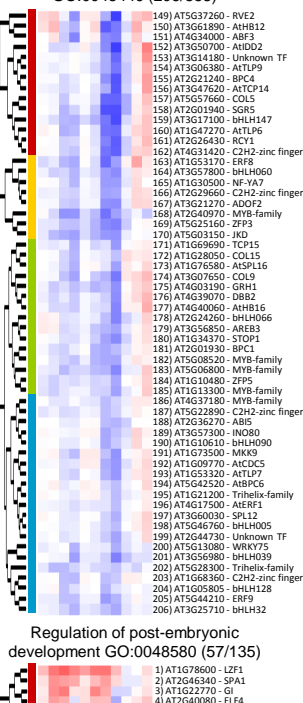

### Embryonic development cluster I

GO:0009790 (123/326)

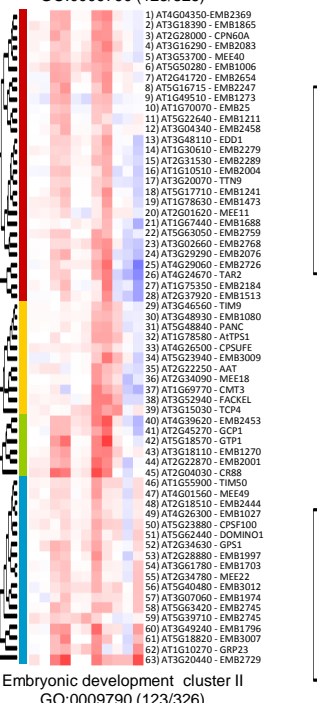

### Cell cycle GO:0007049 (39/123)

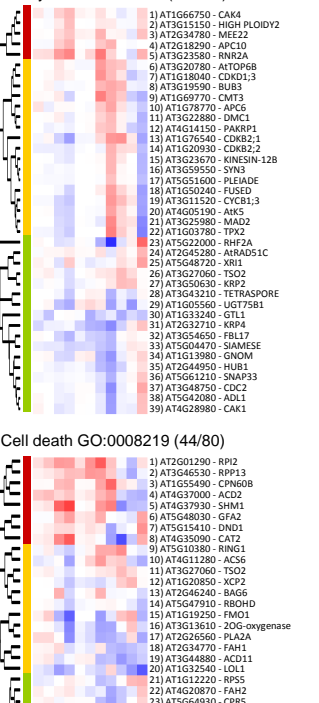

### Regulation of transcription cluster II

GO:0045449 (206/558)

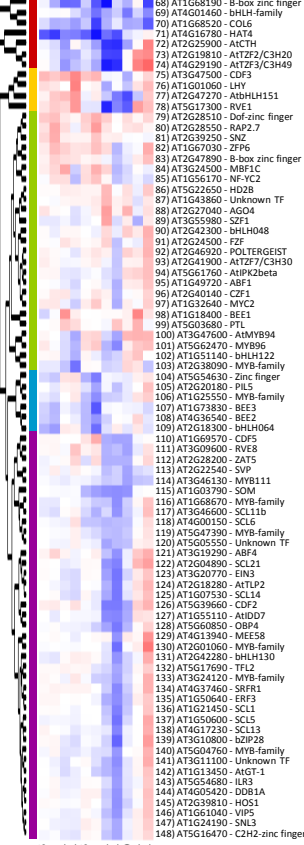

### Regulation of post-embryonic development

GO:0048530 (57/135)

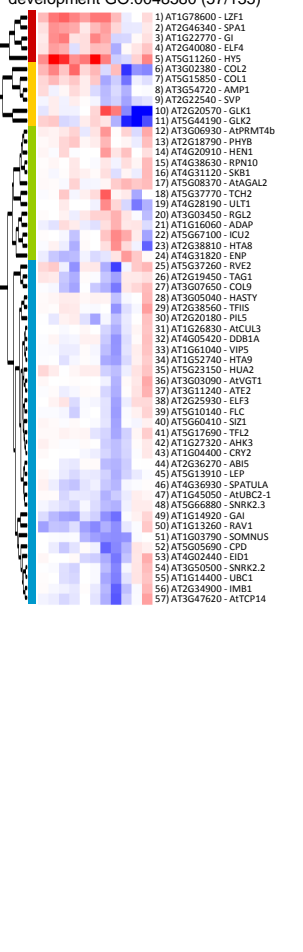

### Embryonic development cluster II

GO:0009790 (123/326)

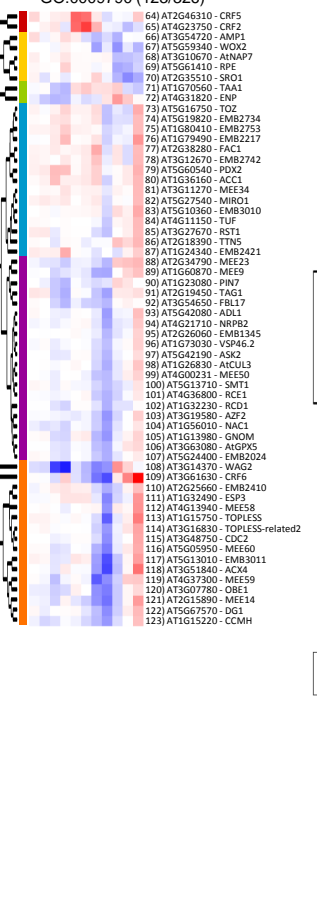

### Cell death GO:0008219 (44/80)

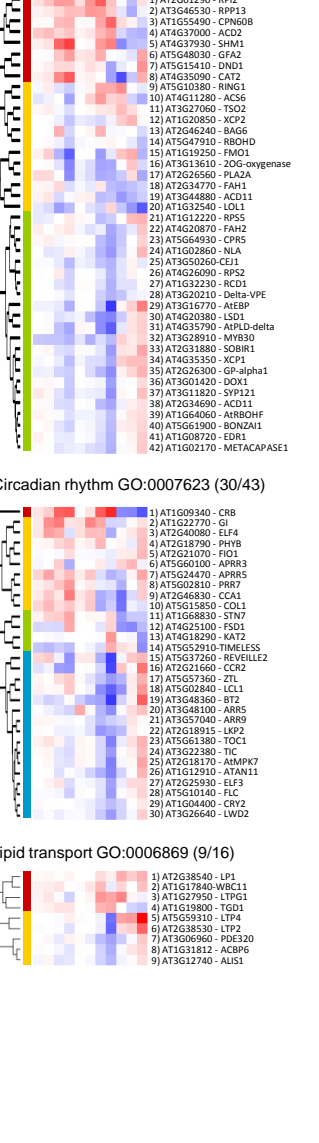

### Circadian rhythm GO:0007623 (30/43)

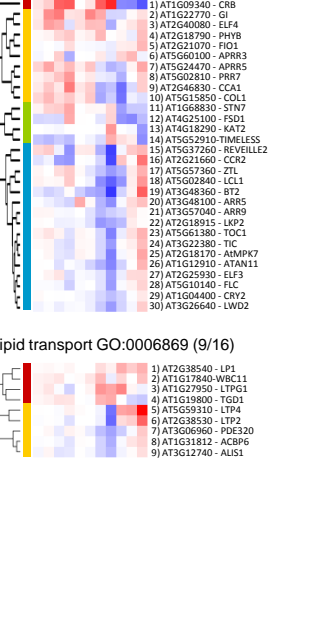

### Lipid transport GO:0006869 (9/16)

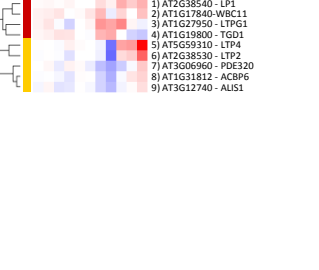

+Lin -Lin +Lin -Lin



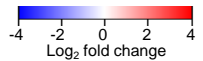

C

Mitochondrion GO:0005739 cluster I (232/551)

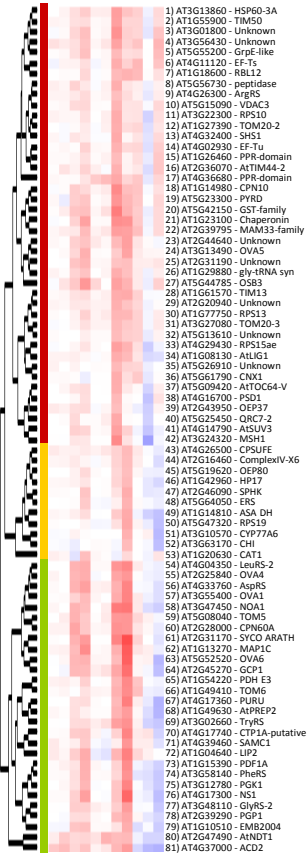

Mitochondrion GO:0005739 cluster III (232/551)

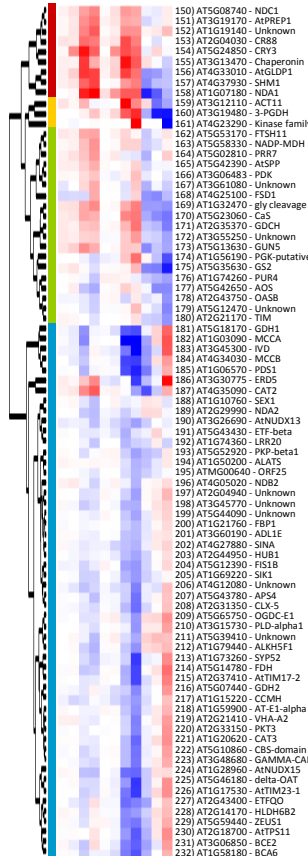

Response to oxidative stress GO:0006979 Cluster I (102/173)

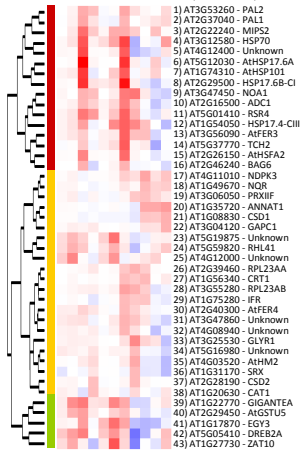

Response to oxidative stress GO:0006979 Cluster II (102/173)

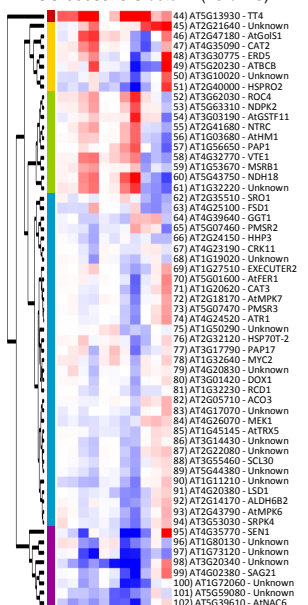

Mitochondrion GO:0005739 cluster II (232/551)

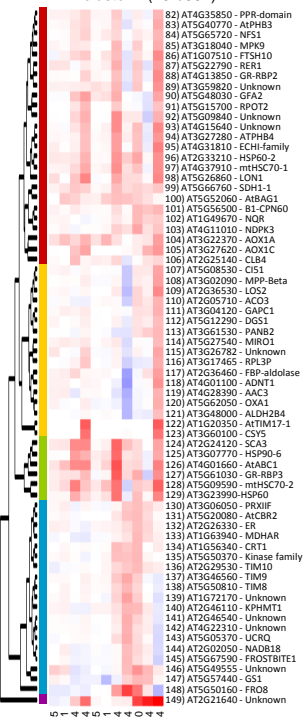

Cell wall GO:0005618 (64/123)

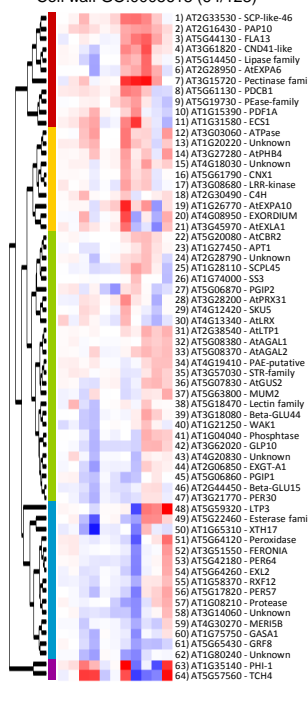

+Lin -Lin -Lin

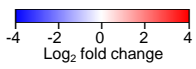

Response to jasmonic acid stimulus GO:0009753 (80/140)

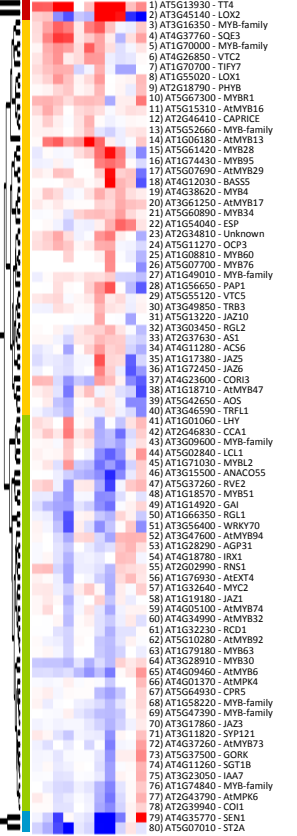

Response to abscisic acid cluster I GO:0009737 (137/245)

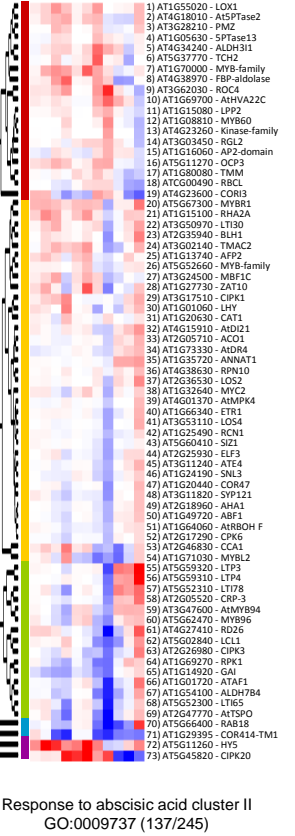

Response to gibberellin stimulus GO:0009739 (59/99)

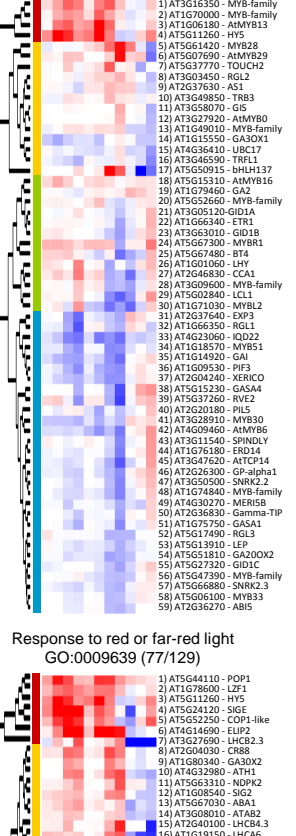

Response to blue light GO:0009637 (30/44)

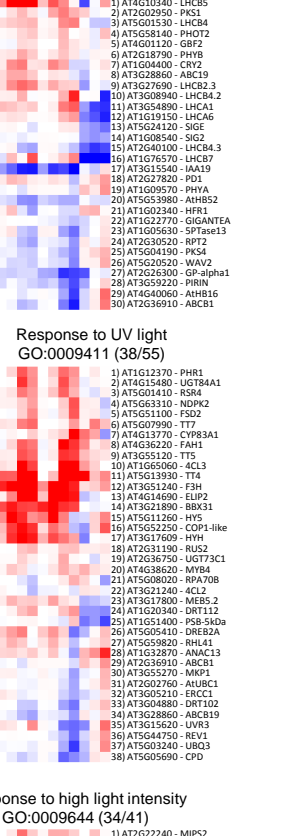

Response to UV light GO:0009411 (38/55)

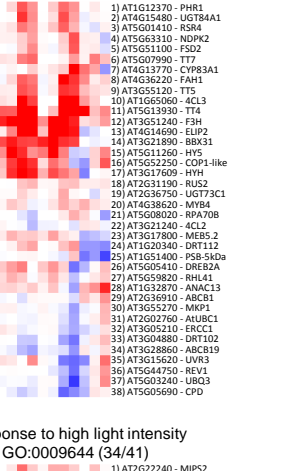

Response to red or far-red light GO:0009639 (77/129)

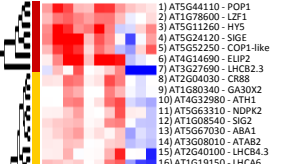

Response to abscisic acid cluster II GO:0009737 (137/245)

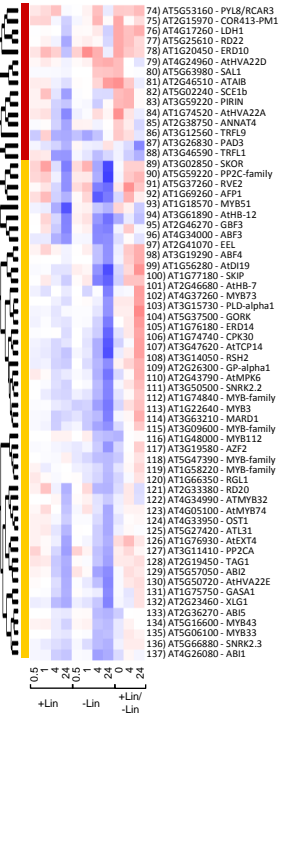

Response to auxin stimulus GO:0009733 (76/169)

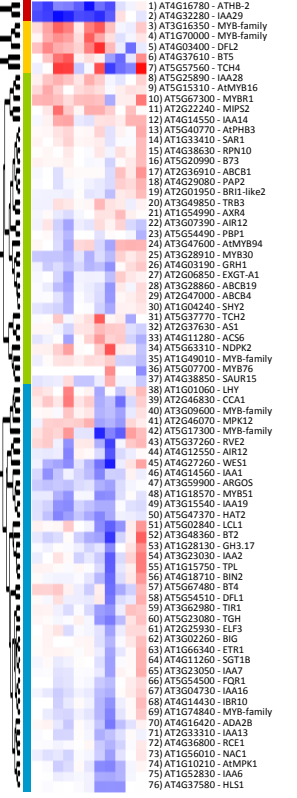

Response to high light intensity GO:0009644 (34/41)

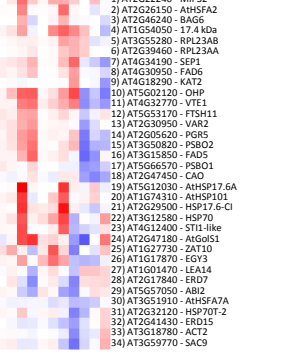

Response to metal ion GO:0010038 (44/70)

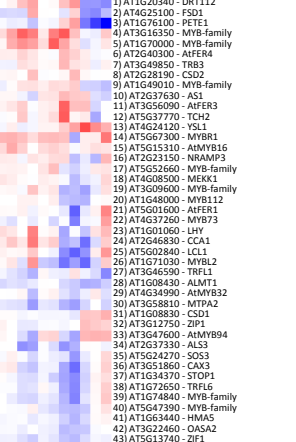

4 3 2 1 0 1 2 3 4  
+Lin -Lin -Lin

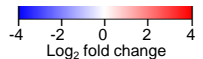

Response to water deprivation  
GO:0009414 (97/145)

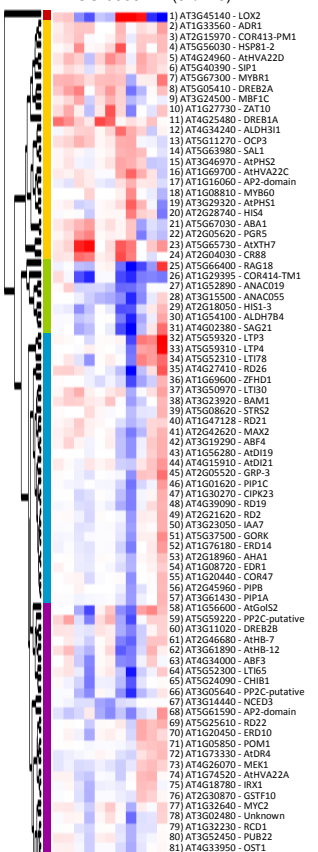

Response to salt stress  
Cluster II GO:0009651 (117/202)

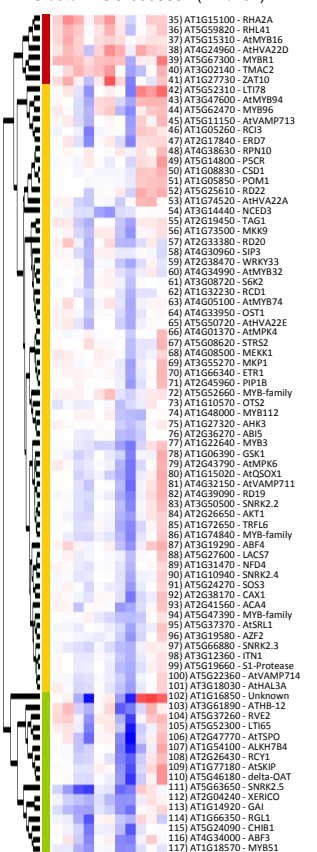

Response to carbohydrate stimulus  
GO:0009743 (93/174)

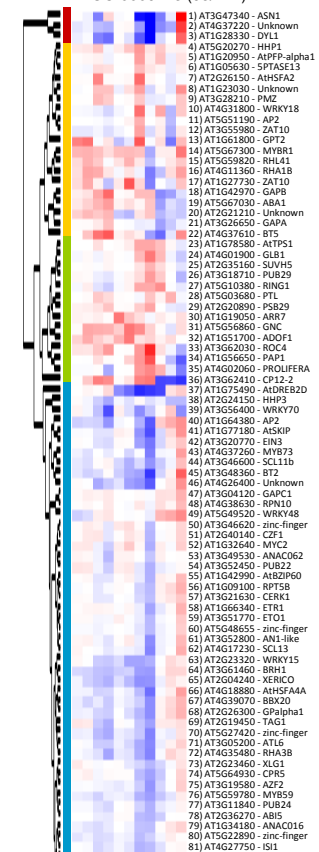

Response to cold cluster II  
GO:0009409 (128/216)

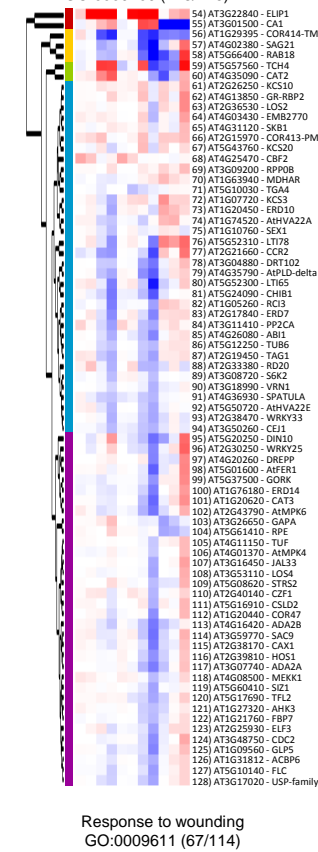

Response to heat GO:0009408 (57/99)

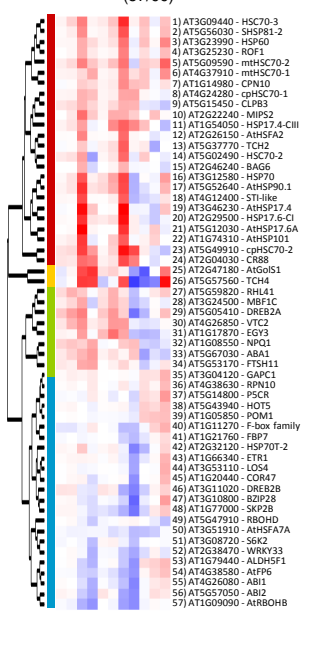

Response to cold cluster I  
GO:0009409 (128/216)

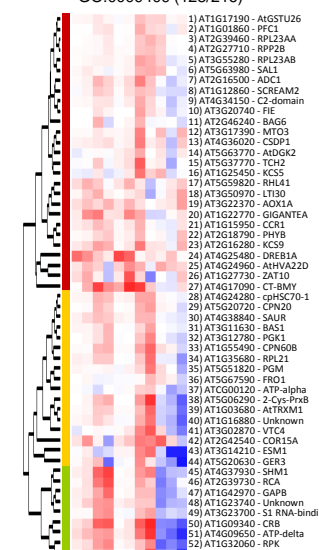

Response to wounding  
GO:0009611 (67/114)

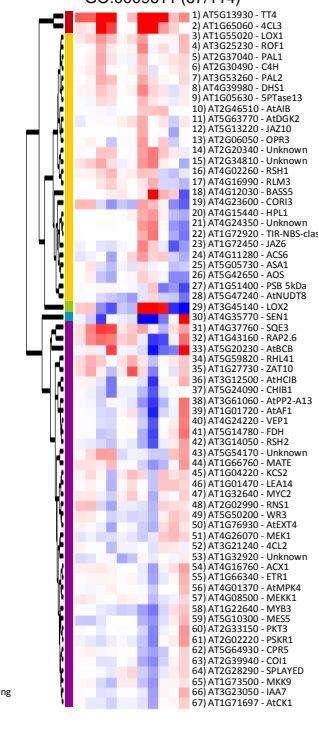

Response to salt stress  
Cluster I GO:0009651 (117/202)

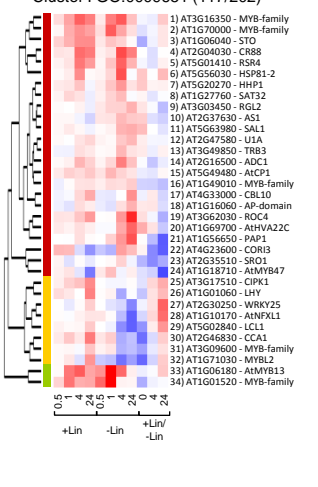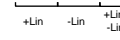





**Supplemental Figure S6.** Agglomerative hierarchical clustering of significantly regulated genes.

A, Agglomerative hierarchical clustering of significantly regulated genes annotated as contributing to 24 biological processes by their expression profiles. The criteria for significant regulation are described in Fig. 2. Enriched GO terms were identified using the criteria described in Supplemental Fig. S4A. The number of significantly regulated genes from a GO term/total number of genes in each GO term is indicated in parentheses next to each GO term number code. As indicated by the key at the bottom of the leftmost column, squares from the left to the right indicate light-regulated expression at 0.5 h, 1 h, 4 h, and 24 h following the BR-fluence-rate shift in lincomycin-treated seedlings; light-regulated expression at 0.5 h, 1 h, 4 h, and 24 h following the BR-fluence-rate shift in untreated seedlings; and plastid-regulated expression at 0 h, 4 h, and 24 following the fluence-rate shift. Up-regulated expression is indicated with red and down-regulated expression is indicated with blue. Color intensity is proportional to the degree of regulation.

B, Agglomerative hierarchical clustering of significantly regulated genes annotated as contributing to the 14 cell components by their expression profiles. Genes and GO terms were clustered, arranged, and labeled as described in A.

C, Agglomerative hierarchical clustering of significantly regulated genes annotated as contributing to 16 biological responses to stimulus by their expression profiles. Genes and GO terms were clustered, arranged and labeled as described in A.

D, Agglomerative hierarchical clustering of significantly regulated ROS-responsive genes by their expression profiles. Genes whose expression is induced fivefold by ROS were previously described (Gadjev et al., 2006) and were obtained from the AtGenExpress repository. The confidence that each ROS-responsive gene list is enriched in our overall data set is indicated with p-values. Groups of ROS-responsive genes were clustered, arranged, and labeled as described in A.

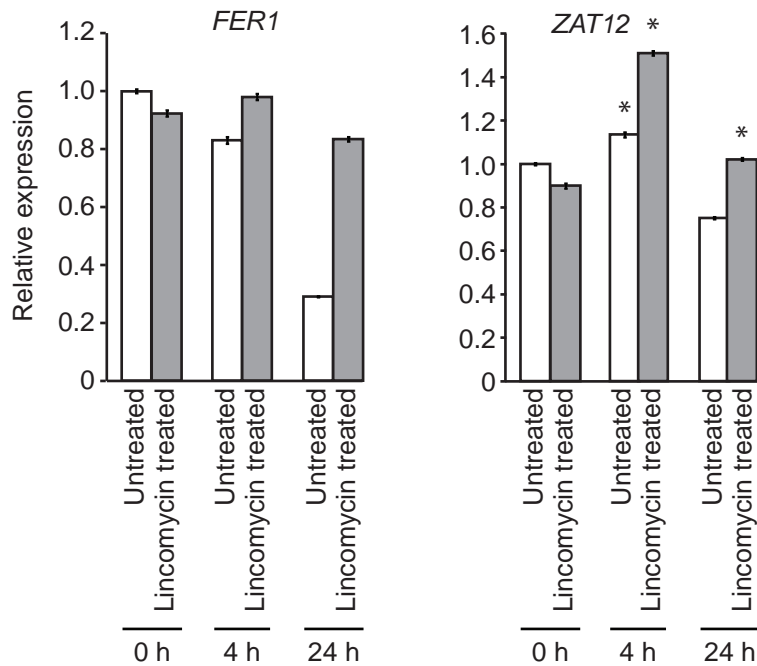

**Supplemental Figure S7.** *FER1* and *ZAT12* expression in lincomycin-treated and untreated seedlings. The expression of *FER1* and *ZAT12* at 0 h, 4 h, and 24 h relative to the BR-fluence-rate shift was quantified with qRT-PCR. The expression of a particular gene in lincomycin-treated seedlings (gray bars) and untreated seedlings (white bars) is normalized to the expression of that same gene in untreated seedlings at 0 h. Error bars indicate standard deviation. \*, indicates a statistically significant increase relative to untreated seedlings at 0 h ( $P \leq 0.0001$  to 0.003).

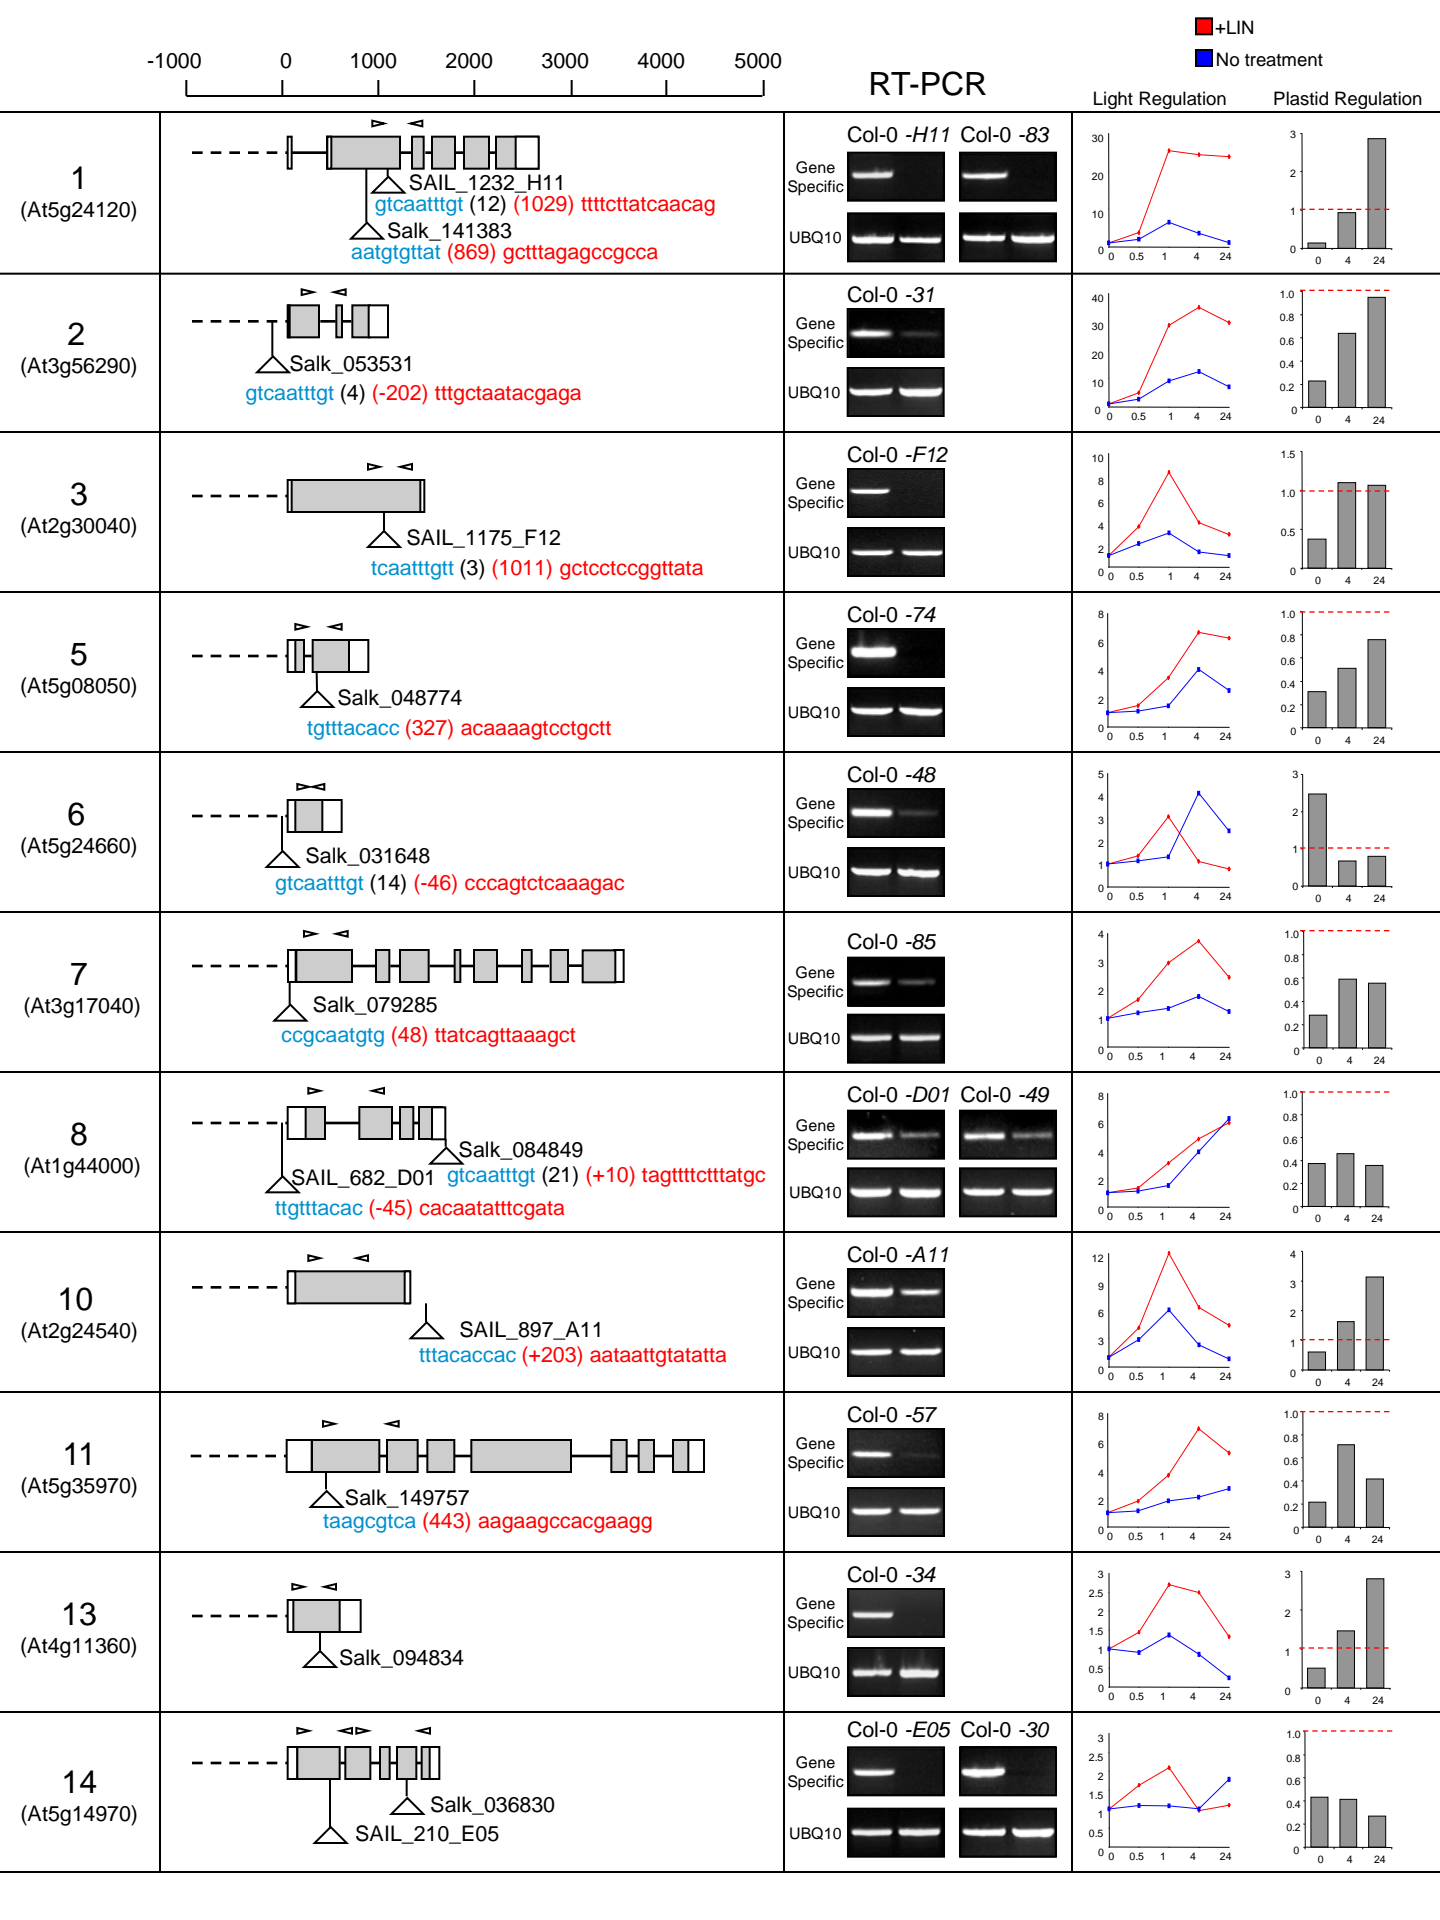

-1000 0 1000 2000 3000 4000 5000

■ +LIN

■ No treatment

RT-PCR

Light Regulation

Plastid Regulation

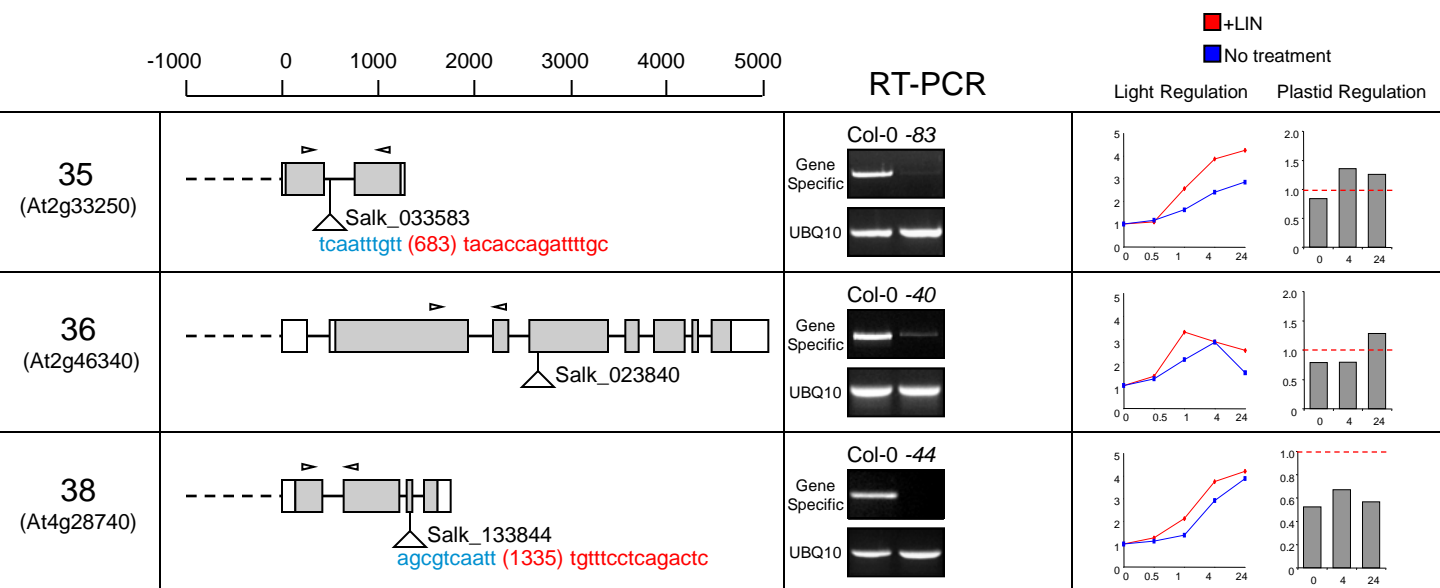

**Supplemental Figure S8.** T-DNA insertion alleles of genes whose expression is more highly induced in lincomycin-treated than in untreated seedlings by 1 h following the BR-fluence-rate shift. The leftmost column contains the AGI code and an arbitrary number for each gene. The adjacent column contains the gene models based on information from The Institute for Genomic Research (TIGR). A scale in base pairs (bp) is indicated above this column. White boxes represent 5'- and 3'-untranslated regions (UTRs). Gray boxes represent exons. Dashed lines represent promoter sequences. Solid lines represent introns. The position of each T-DNA insertion is indicated to the left of the respective Salk or SAIL accession code. The sequence of the insertion site is indicated below each Salk or SAIL number and is color coded. The blue bases indicate the T-DNA sequence flanking the insertion site. Black numbers in parentheses indicate the number of bases that match neither the T-DNA nor the genomic sequence. The red bases indicate the genomic sequence flanking the T-DNA insertion. Red numbers in parentheses indicate the distance of the T-DNA insertion from the first base of the 5'-UTR sequence in bp. Negative red numbers indicate the number of bp upstream of the 5'-UTR sequence, and positive red numbers indicate the number of bp downstream of the 5'-UTR sequence. The third column from the left shows the RNA phenotype caused by each T-DNA insertion allele. RNA phenotypes were scored by extracting total RNA from 7-d-old seedlings and using RT-PCR to detect transcripts from genes that contain T-DNA insertions. The location of each gene-specific primer pair is represented as converging arrows above each gene model in the second column from the left. The last two numbers of Salk accession code or the last 3 digits of the SAIL accession code are used to name the T-DNA alleles. For example, the T-DNA alleles of gene number 1 (At5g24120) are SAIL\_1232\_H11 and Salk\_141383. In this figure, these alleles are named -H11 and -83, respectively. RT-PCR detection of *UBQ10* transcripts was used to test whether equal amounts of total RNA from both T-DNA mutants and wild type were used in each experiment. The fourth column from the left contains graphs that indicate the light- and plastid-regulated expression of each gene following the BR-fluence-rate shift. Expression levels are derived from microarray analysis. The leftmost graph indicates the expression level following the BR-fluence-rate shift. Relative transcript levels are indicated on the ordinate. Time in h following the BR-fluence-rate shift is indicated on the abscissa. Transcript levels in lincomycin-treated seedlings (+Lin) are indicated in red. Transcript levels in untreated seedlings (no treatment) are indicated in blue. The rightmost graph is a histogram that quantifies the plastid regulation of each gene. Plastid-regulated gene expression is defined as a ratio of expression in lincomycin-treated to expression in untreated seedlings at 0 h, 4 h, or 24 h following the fluence-rate shift. The dashed-red line indicates no effect of the lincomycin treatment on gene expression.

-1000 0 1000 2000 3000 4000 5000

RT-PCR

■ +LIN  
■ No treatment

Light Plastid Regulation

|                           |                                                                                                                                     |                              |  |
|---------------------------|-------------------------------------------------------------------------------------------------------------------------------------|------------------------------|--|
| <p>47<br/>(At5g43260)</p> | <p>Salk_072798<br/>agcgtcaatg (247) tgttatcgatggtcc<br/>SALK_108550</p>                                                             | <p>Col-0 -98 Col-0 -50</p>   |  |
| <p>48<br/>(At1g13670)</p> | <p>Salk_009943<br/>gtcaagtgt (12) (-48) atcggtaactgaac</p>                                                                          | <p>Col-0 -43</p>             |  |
| <p>51<br/>(At1g22770)</p> | <p>gi-1</p>                                                                                                                         | <p>N/A</p>                   |  |
| <p>52<br/>(At5g24850)</p> | <p>Salk_122430</p>                                                                                                                  | <p>Col-0 -30</p>             |  |
| <p>53<br/>(At2g46420)</p> | <p>Salk_029841<br/>Salk_029850<br/>agcgtcaatt (3176) tgttctattgatca (3317) ctctaagcgt (3317) caattaatctaagtc</p>                    | <p>Col-0 -50 Col-0 -41</p>   |  |
| <p>54<br/>(At1g66330)</p> | <p>Salk_117745<br/>gcgtcaattt (7) (367) taggtgttcccaat</p>                                                                          | <p>Col-0 -45</p>             |  |
| <p>55<br/>(At4g26150)</p> | <p>Salk_003995<br/>ctgcaatttg (932) ttaccagtagaga</p>                                                                               | <p>Col-0 -95</p>             |  |
| <p>57<br/>(At3g02910)</p> | <p>Salk_145852</p>                                                                                                                  | <p>Col-0 -52</p>             |  |
| <p>58<br/>(At1g51090)</p> | <p>SAIL_596_G09<br/>SAIL_1150_A03<br/>aattgtttac (196) (534) ggtttgggtggctca<br/>gtcaatttg (10) (-1053) tcaaggatcacgatg</p>         | <p>Col-0 -G09 Col-0 -A03</p> |  |
| <p>59<br/>(At5g01820)</p> | <p>SALK_009699<br/>Salk_149471<br/>aatatactctg (9) (913) aaggagataaccgg<br/>tcaatttgtt (713) ttctcgtcgaggagg</p>                    | <p>Col-0 -71 Col-0 -99</p>   |  |
| <p>60<br/>(At5g64170)</p> | <p>Salk_093925<br/>Salk_071946<br/>gcaatgtgtt (3929) attttgcttagccaa (4000) ttatgctgtgagat<br/>ccgcaatgtg (4000) ttatgctgtgagat</p> | <p>Col-0 -25 Col-0 -46</p>   |  |

-1000 0 1000 2000 3000 4000 5000

RT-PCR

■ +LIN  
■ No treatment

Light Plastid Regulation

|                           |                                                                             |                                                            |  |
|---------------------------|-----------------------------------------------------------------------------|------------------------------------------------------------|--|
| <p>63<br/>(At5g05410)</p> | <p>SAIL_365_F10<br/>ttgtcacac (3) (1722) ggcccataaagcttc</p>                | <p>Col-0 -F10</p> <p>Gene Specific<br/>UBQ10</p>           |  |
| <p>64<br/>(At2g21320)</p> | <p>Salk_061956<br/>gcgcaattt (5) (1436) tatctttacaggaa</p>                  | <p>Col-0 -56</p> <p>Gene Specific<br/>UBQ10</p>            |  |
| <p>65<br/>(At1g78600)</p> | <p>SAIL_368_F08<br/>aattgttta (126) (42) gtaggagtgtctaa</p>                 | <p>Col-0 -F08</p> <p>Gene Specific<br/>UBQ10</p>           |  |
| <p>66<br/>(At5g67370)</p> | <p>Salk_023292<br/>cgccaatttg (541) tccaagaacagttaa</p>                     | <p>Col-0 -92</p> <p>Gene Specific<br/>UBQ10</p>            |  |
| <p>67<br/>(At5g59220)</p> | <p>Salk_142672 SAIL_520_H12<br/>ccacaataata (111) (902) cttatgatcggagga</p> | <p>Col-0 -72 Col-0 -H12</p> <p>Gene Specific<br/>UBQ10</p> |  |
| <p>68<br/>(At2g28550)</p> | <p>Salk_069677<br/>ttaagtgtc (1) (1699) gcaatcaacactaat</p>                 | <p>Col-0 -77</p> <p>Gene Specific<br/>UBQ10</p>            |  |
| <p>69<br/>(At2g40080)</p> | <p>SAIL_424_B07<br/>ttgtttacac (1) (362) agcttaatgaaccgg</p>                | <p>Col-0 -B07</p> <p>Gene Specific<br/>UBQ10</p>           |  |
| <p>70<br/>(At5g23730)</p> | <p>Salk_015765<br/>ttaagtgtc (78) (-84) ccctcagtaaataat</p>                 | <p>Col-0 -65</p> <p>Gene Specific<br/>UBQ10</p>            |  |
| <p>71<br/>(At4g28290)</p> | <p>Salk_086732<br/>ttacaccac (53) aataaaataaaatct</p>                       | <p>Col-0 -32</p> <p>Gene Specific<br/>UBQ10</p>            |  |
| <p>72<br/>(At5g58380)</p> | <p>Salk_111320<br/>ttacaccac (1356) caatctgatggagat</p>                     | <p>Col-0 -20</p> <p>Gene Specific<br/>UBQ10</p>            |  |
| <p>74<br/>(At3g17800)</p> | <p>Salk_073038<br/>ccacaatata (1685) tcttgatcttatgt</p>                     | <p>Col-0 -38</p> <p>Gene Specific<br/>UBQ10</p>            |  |

**Supplemental Figure S9.** T-DNA insertion alleles of genes whose expression is similarly induced in lincomycin-treated and untreated seedlings by 1 h following the BR-fluence-rate shift. The leftmost column contains the AGI code and an arbitrary number for each gene. The adjacent column contains the gene models based on information from The Institute for Genomic Research (TIGR). The gene models are labeled as described in Supplemental Fig. S8. *gi-1* (a.k.a., mutant 51) is not a T-DNA insertion allele. *gi-1* has a 5-bp deletion that introduces a premature stop codon (indicated with an arrow) and deletes 171 amino acid residues from the carboxy-terminus of the GIGANTEA protein (Park et al., 1999). The third column from the left shows the RNA phenotype caused by each T-DNA insertion allele. RNA phenotypes were scored using RT-PCR as described in Supplemental Fig. S8. The fourth column from the left contains graphs that indicate the light- and plastid-regulated expression of each gene following the BR-fluence-rate shift. The graphs are labeled as described in Supplemental Fig. S8.



| Gene name     | AGI code  | T-DNA allele | Gene Specific |      | <i>Ubg10</i> |      |
|---------------|-----------|--------------|---------------|------|--------------|------|
|               |           |              | T-DNA         |      | T-DNA        |      |
|               |           |              | Col-0         | line | Col-0        | line |
| <i>AtPP7</i>  | At5g63870 | Salk_089764  |               |      |              |      |
| <i>AtMYC2</i> | At1g32640 | Salk_017005  |               |      |              |      |
| <i>HFR1</i>   | At1g02340 | Salk_037727  |               |      |              |      |
| <i>GBF1</i>   | At4g36730 | Salk_096612  |               |      |              |      |
| <i>HRB1</i>   | At5g49230 | Salk_087868  |               |      |              |      |
| <i>SPA1</i>   | At2g46340 | Salk_023840  |               |      |              |      |
| <i>ZTL</i>    | At5g57360 | Salk_012440  |               |      |              |      |
| <i>GBF3</i>   | At2g46270 | Salk_082840  |               |      |              |      |
| <i>SPA2</i>   | At4g11110 | Salk_009832  |               |      |              |      |
| <i>PIF1</i>   | At2g20180 | Salk_131872  |               |      |              |      |
| <i>LAF3</i>   | At3g55850 | SAIL_573_B05 |               |      |              |      |
| <i>LAF1</i>   | At4g25560 | Salk_079609  |               |      |              |      |
| <i>FHY3</i>   | At3g22170 | Salk_002711  |               |      |              |      |
| <i>FIN219</i> | At2g46370 | Salk_075487  |               |      |              |      |
| <i>PAT1</i>   | At5g48150 | Salk_064220  |               |      |              |      |
| <i>FAR1</i>   | At4g15090 | Salk_031652  |               |      |              |      |
| <i>PAPP5</i>  | At2g42810 | Salk_021153  |               |      |              |      |

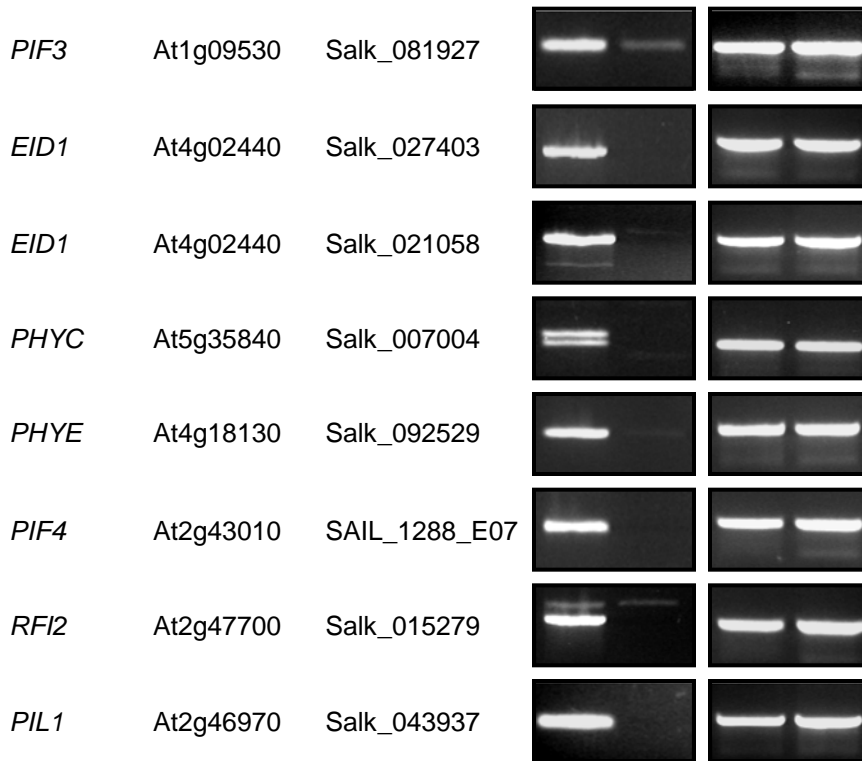

**Supplemental Figure S10.** Characterization of T-DNA insertion alleles of genes that encode light-signaling factors. RNA phenotypes were scored using RT-PCR to detect transcripts from genes that contain T-DNA insertions. RT-PCR detection of transcripts from *UBQ10* was used to test whether equal amounts of total RNA from both T-DNA mutants and wild type were used in each experiment. These genes were at least previously implicated in light signaling: *AtPP7* (Møller et al., 2003); *AtMYC2/ZBF1* (Yadav et al., 2005); *HFR1* (Fairchild et al., 2000); *GBF1* (Schindler et al., 1992); *HRB1* (Kang et al., 2005); *SPA1* (Hoecker et al., 1998); *ZTL* (Kim et al., 2007); *GBF3* (Schindler et al., 1992); *SPA2* (Laubinger et al., 2004); *PIF1* (Huq et al., 2004); *LAF3* (Ballesteros et al., 2001); *LAF1* (Møller et al., 2001); *FHY3* (Wang and Deng, 2002); *FIN219* (Hsieh et al., 2000); *PAT1* (Bolle et al., 2000); *FAR1* (Hudson et al., 1999); *PAPP5* (Ryu et al., 2005); *PIF3* (Ni et al., 1998); *EID1* (Dieterle et al., 2001); *PHYC* (Monte et al., 2003); *PHYE* (Devlin et al., 1998); *PIF4* (Huq and Quail, 2002); *RFI2* (Chen and Ni, 2006); *PIL1* (Salter et al., 2003).

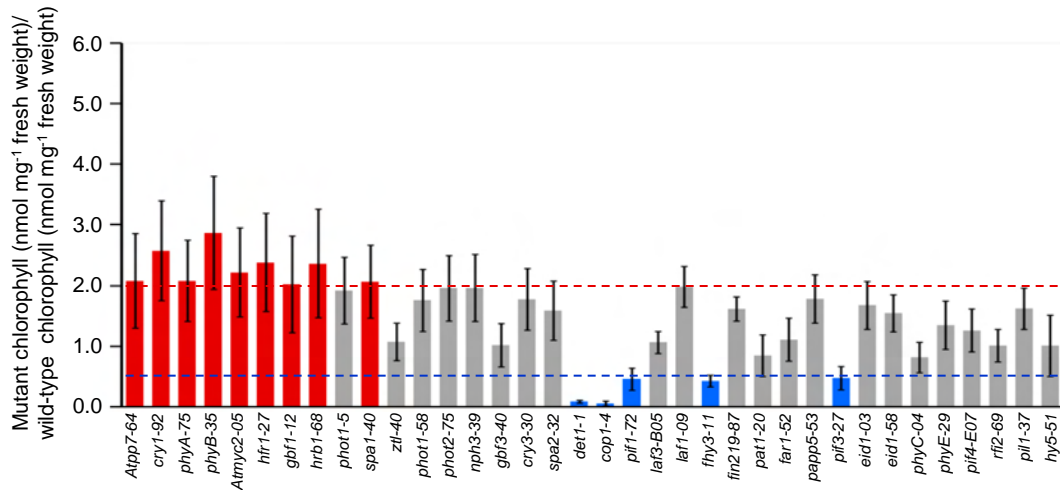

**Supplemental Figure S11.** Chlorophyll phenotypes of light signaling mutants. De-etiolation was performed and relative chlorophyll levels were quantified for the indicated light-signaling mutants as described in Fig. 7. These alleles were previously generated using either EMS or T-DNA insertional mutagenesis. Names for T-DNA insertion alleles were created from the gene name and the last two numbers of the Salk accession code or the last three digits of the SAIL accession code. For example, the T-DNA insertion allele of *AtPP7* that is derived from Salk\_089764 is named *Atpp7-64*. *cry1-92*, *phyA-75*, *phyB-35*, *phot1-58*, *phot2-75*, *nph3-39*, *cry3-30*, and *hy5-51* were previously characterized (Ruckle et al., 2007). The remaining alleles derived from T-DNA insertional mutagenesis are described in Supplemental Fig. S10. The alleles derived from EMS mutagenesis were *cop1-4* (Deng et al., 1992; Deng and Quail, 1992), *det1-1* (Chory et al., 1989), and *phot1-5*, which was formerly known as *nph1-5* (Liscum and Briggs, 1995; Huala et al., 1997). Error bars represent 95% confidence intervals.

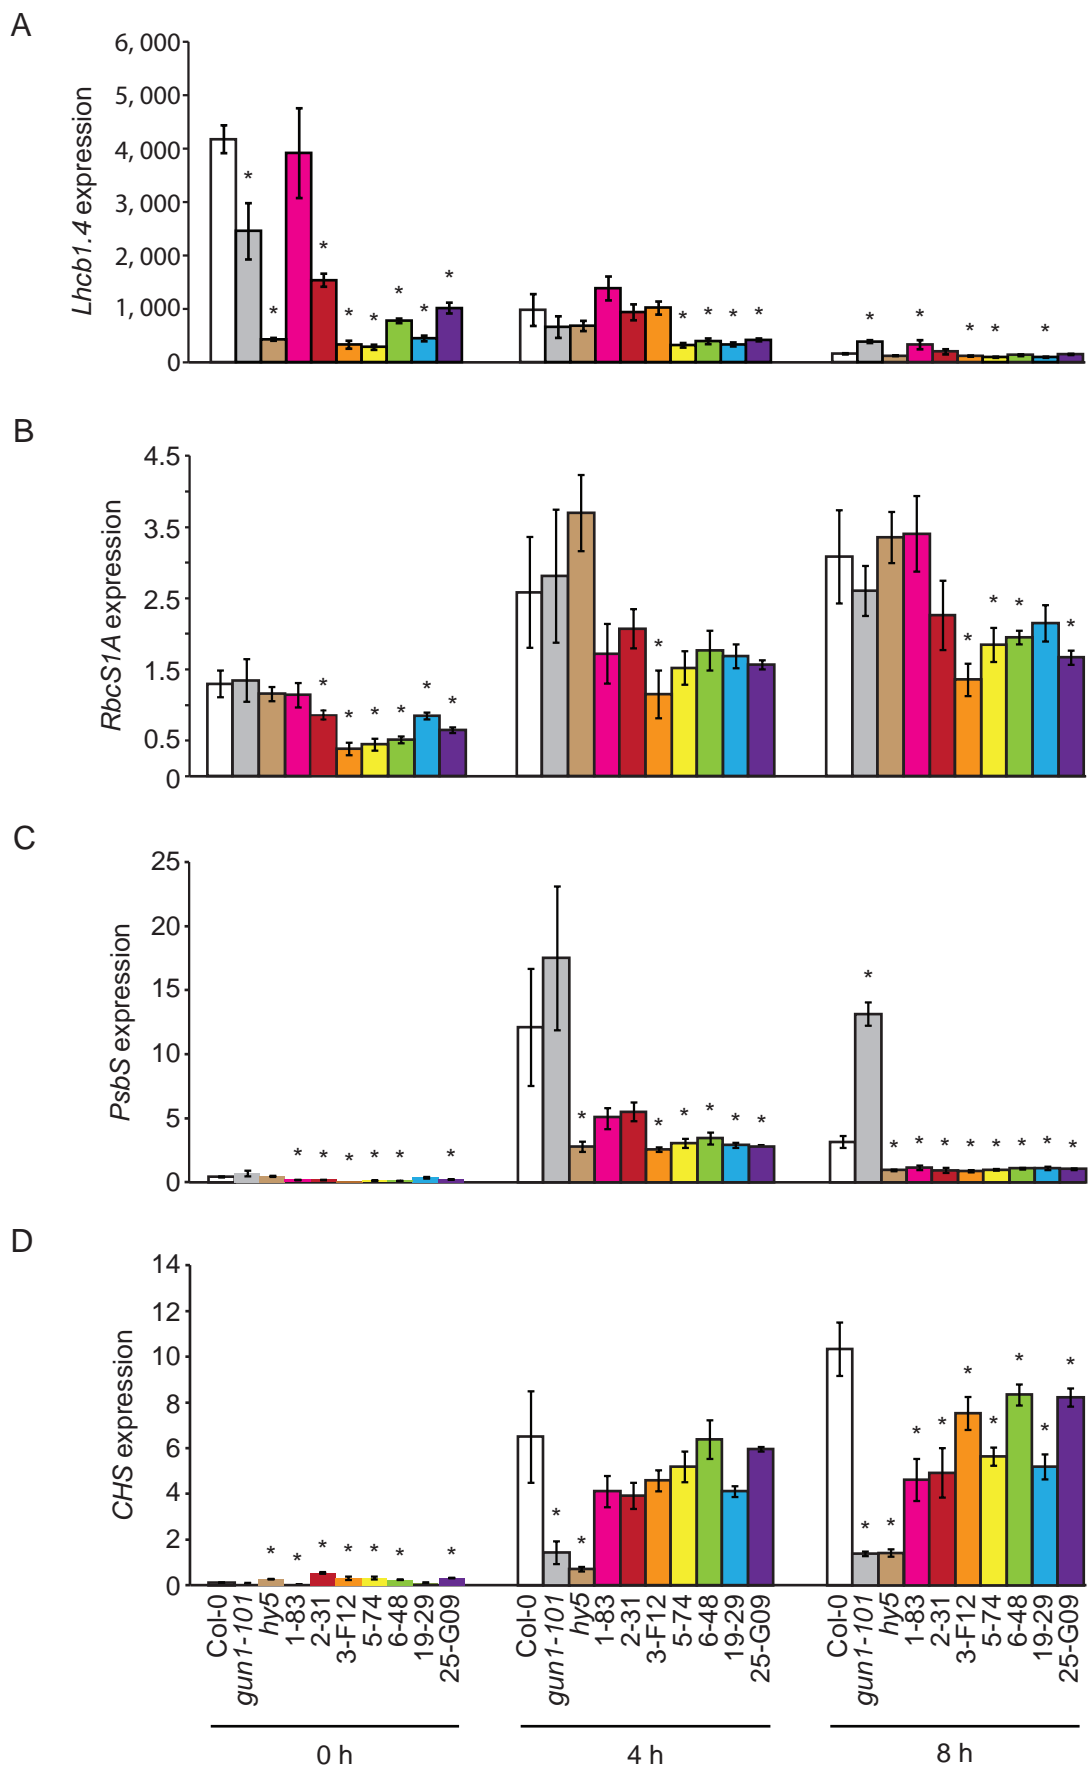

**Supplemental Figure S12.** *Lhcb1.4*, *RbcS1A*, *PsbS* and *CHS* expression in lincomycin-treated *end* mutants after an increase in fluence rate.

A, *Lhcb1.4* expression in particular *end* mutants after an increase in fluence rate. Wild type (Col-0) and the indicated mutants were grown on media that contained 0.5 mM lincomycin for 6 d in  $0.5 \mu\text{mol m}^{-2} \text{s}^{-1}$  BR light, and then transferred to  $60 \mu\text{mol m}^{-2} \text{s}^{-1}$  BR light. Seedlings were collected immediately before the fluence-rate shift (0 h), and at 4 h and 8 h following the fluence rate shift. Transcript levels were quantified by qRT-PCR. The order of the lines from left to right: wild type (Col-0, white bars), *gun1-101* (gray bars), *hy5* (brown bars), 1-83 (pink bars), 2-31 (red bars), 3-F12 (orange bars), 5-74 (yellow bars), 6-48 (green bars), 19-29 (blue bars), and 25-G09 (purple bars). Three biological replicates were analyzed for wild type (Col-0) and each mutant in each condition. Error bars indicate standard deviation. \* indicates a statistically significant increase ( $P=0.0002$  and  $0.02$ ) or statistically significant decrease ( $P<0.0001$  to  $0.03$ ) in the expression of *Lhcb1.4* in a particular mutant relative to wild type.

B, *RbcS1A* expression in particular *end* mutants after an increase in fluence rate. Analysis of *RbcS1A* expression was as described for *Lhcb1.4* expression in A. \* indicates a statistically significant decrease ( $P=0.002$  to  $0.04$ ) in the expression of *RbcS1A* in a particular mutant relative to wild type.

C, *PsbS* expression in particular *end* mutants after an increase in fluence rate. Analysis of *PsbS* expression was as described for *Lhcb1.4* expression in A. \* indicates a statistically significant increase ( $P<0.0001$ ) or a statistically significant decrease ( $P=0.001$  to  $0.03$ ) in the expression of *PsbS* in a particular mutant relative to wild type.

D, *CHS* expression in particular *end* mutants after an increase in fluence rate. Analysis of *CHS* expression was as described for *Lhcb1.4* expression in A. \* indicates a statistically significant increase ( $P=0.0001$  to  $0.007$ ) or a statistically significant decrease ( $P=0.0002$  to  $0.01$ ) in the expression of *CHS* in a particular mutant relative to wild type.

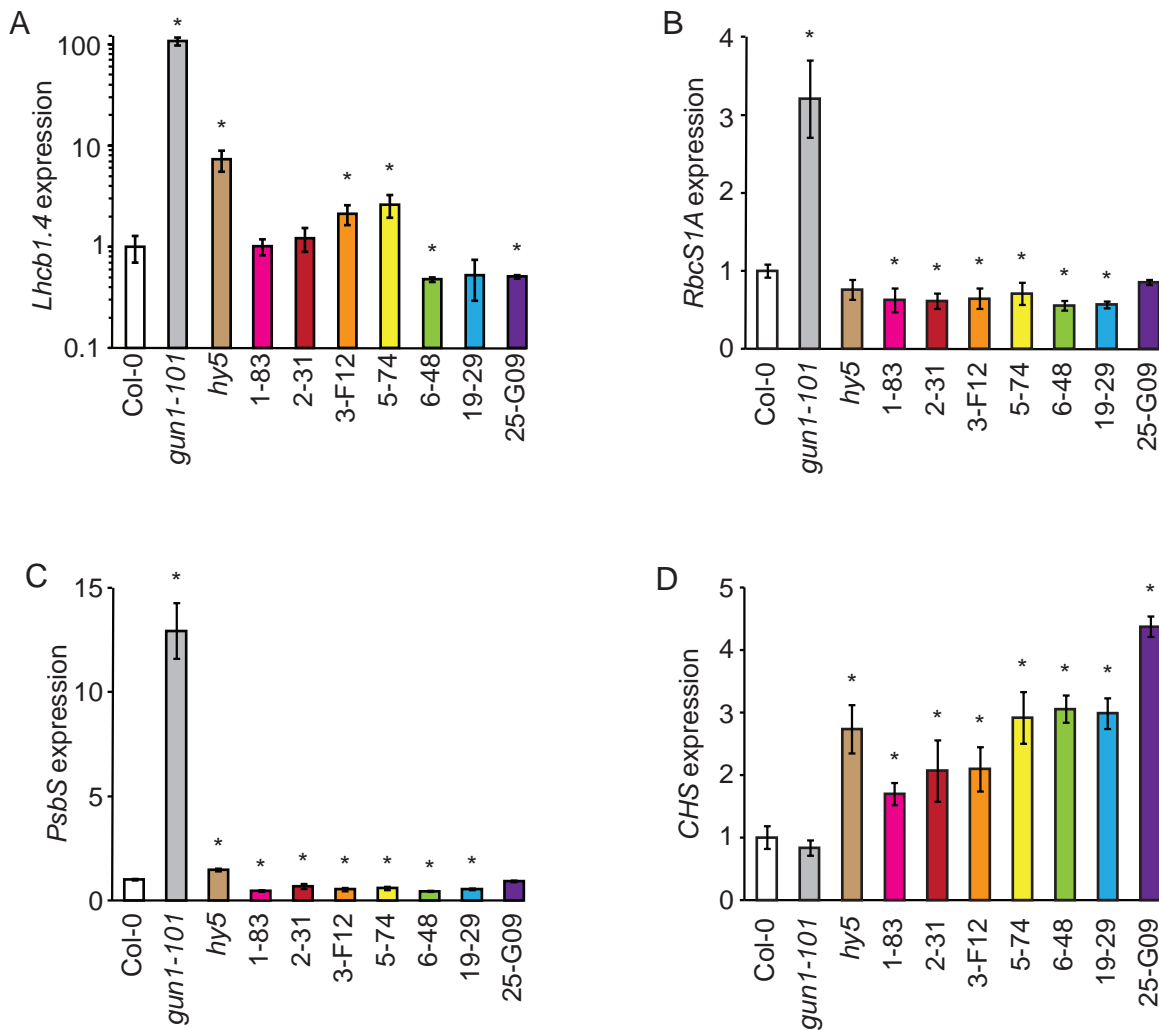

**Supplemental Figure S13.** *Lhcb1.4*, *RbcS1A*, *PsbS* and *CHS* expression in particular lincomycin-treated *end* mutants in continuous 60  $\mu\text{mol m}^{-2} \text{s}^{-1}$  BR light.

A, *Lhcb1.4* expression in particular *end* mutants grown in continuous 60  $\mu\text{mol m}^{-2} \text{s}^{-1}$  BR light. Wild type (Col-0) and the indicated mutants were grown on media that contained 0.5 mM lincomycin for 6 d in continuous 60  $\mu\text{mol m}^{-2} \text{s}^{-1}$  BR light. Transcript levels were quantified by qRT-PCR. Three biological replicates were analyzed for wild type (Col-0) and each mutant. Error bars indicate standard deviation. \* indicates a statistically significant increase ( $P < 0.0001$  to 0.003) or a statistically significant decrease ( $P = 0.04$ ) in the expression of *Lhcb1.4* in a particular mutant relative to wild type.

B, *RbcS1A* expression in particular *end* mutants. Analysis of *RbcS1A* expression was as described in A. \* indicates a statistically significant increase ( $P = 0.002$ ) or statistically significant decrease (0.001 to 0.04) in the expression of *RbcS1A* in a particular mutant relative to wild type.

C, *PsbS* expression in particular *end* mutants. Analysis of *PsbS* expression was as described in A. \* indicates a statistically significant increase ( $P = 0.0001$  and 0.0004) or a statistically significant decrease ( $P < 0.0001$  to 0.01) in the expression of *PsbS* in a particular mutant relative to wild type.

D, *CHS* expression in indicated *end* mutants. Analysis of *CHS* expression was as described in A. \* indicates a statistically significant increase in the expression of *CHS* in a particular mutant relative to wild type ( $P < 0.0001$  to 0.02).

0.5 mM lincomycin

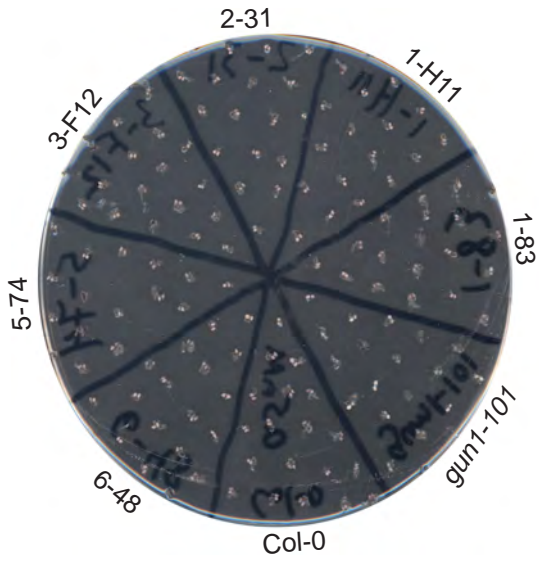

0.15 mM lincomycin

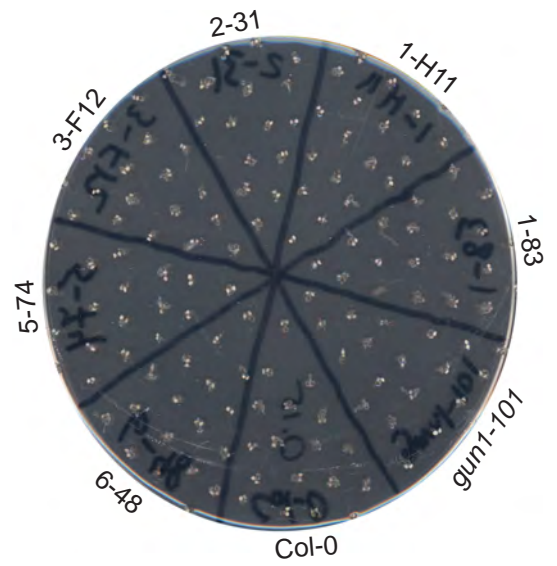

0.05 mM lincomycin

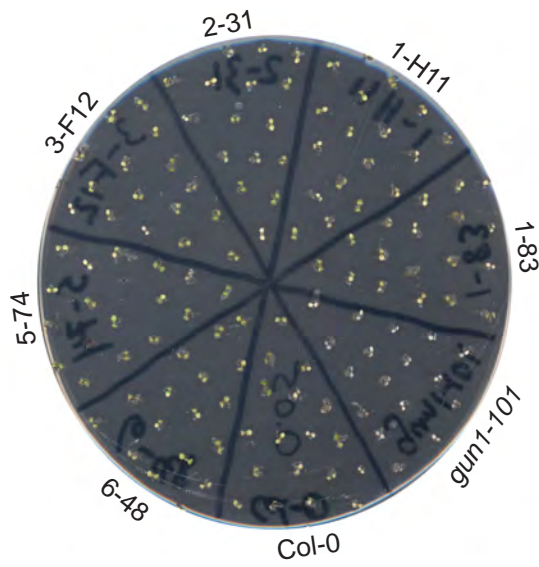

0.015 mM lincomycin

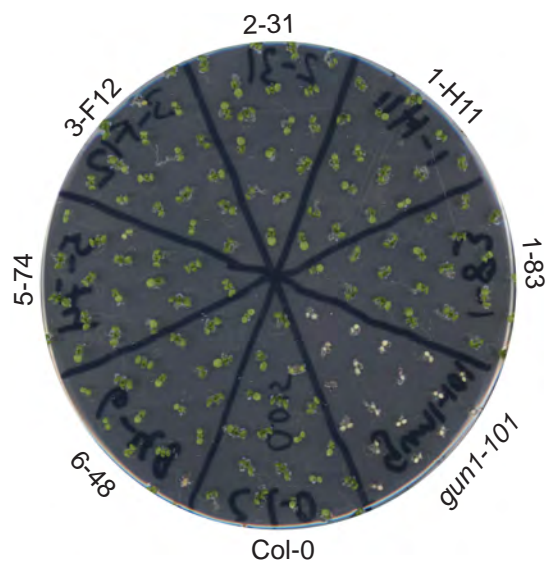

0.005 mM lincomycin

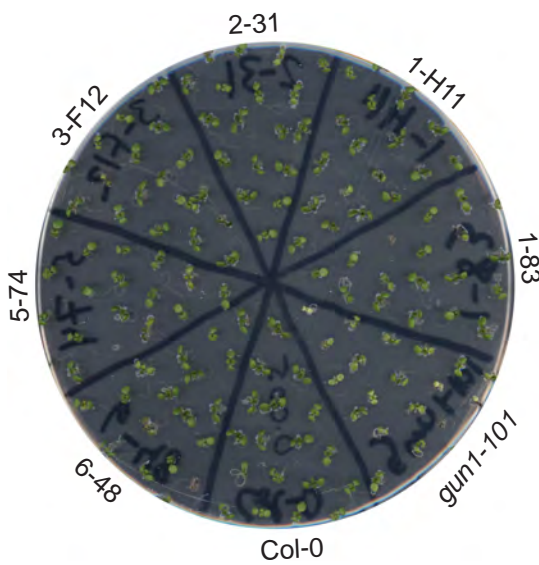

No lincomycin

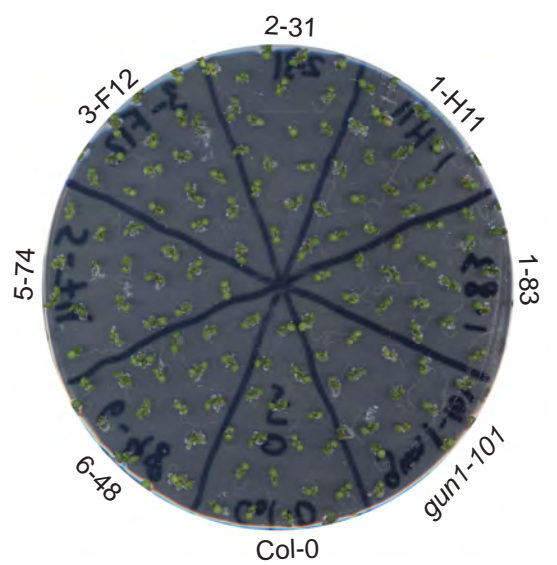

**Supplemental Figure S14.** *gun1-101*, 1-83, 1-H11, 2-31, 3-F12, 5-74, and 6-48 treated with various concentrations of lincomycin. *gun1-101* and the indicated *end* mutants were grown for 8 d in continuous white light at a fluence rate of  $100 \mu\text{mol m}^{-2} \text{s}^{-1}$  on media containing the indicated concentrations of lincomycin.



0.5 mM lincomycin

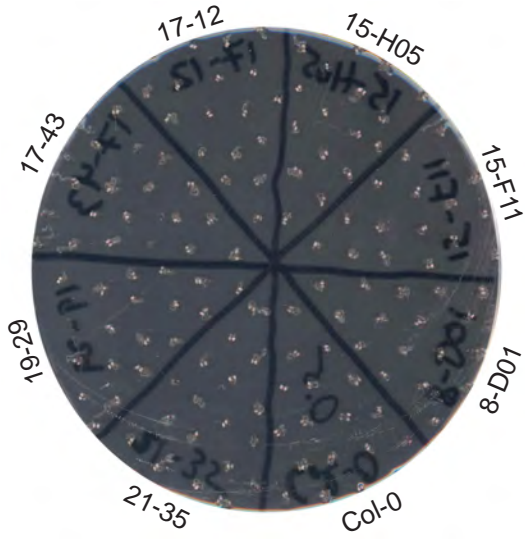

0.15 mM lincomycin

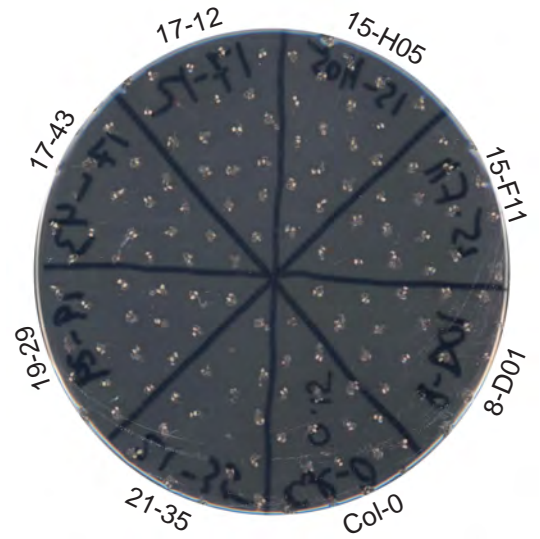

0.05 mM lincomycin

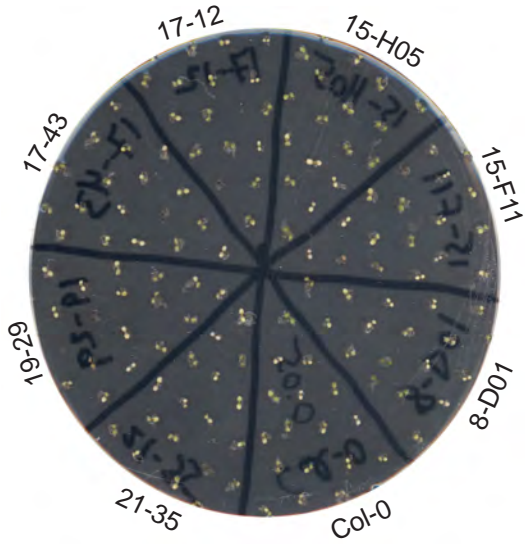

0.015 mM lincomycin

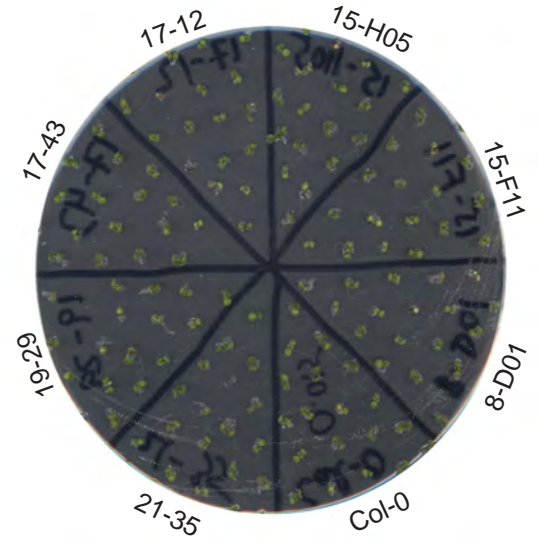

0.005 mM lincomycin

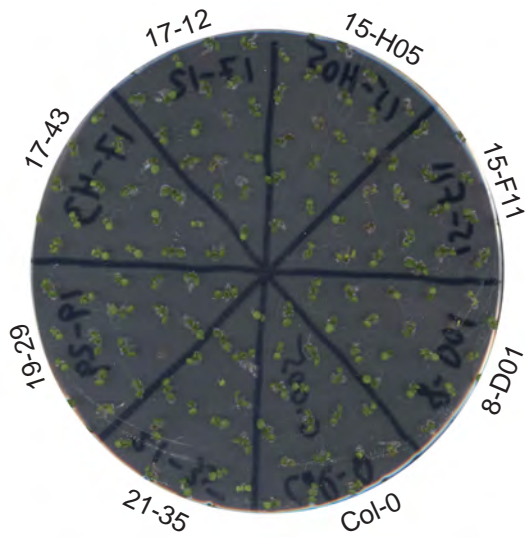

No lincomycin

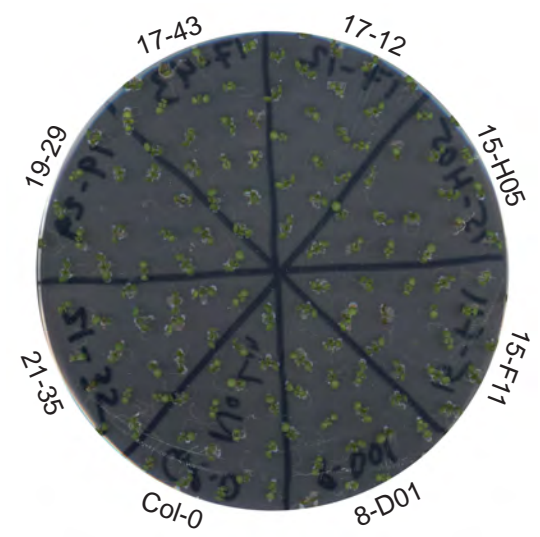

**Supplemental Figure S15.** 8-D01, 15-F11, 15-H05, 17-12, 17-43, 19-29, and 21-35 treated with various concentrations of lincomycin. The indicated *end* mutants were grown for 8 d in continuous white light at a fluence rate of  $100 \mu\text{mol m}^{-2} \text{s}^{-1}$  on media containing the indicated concentrations of lincomycin.

0.5 mM lincomycin

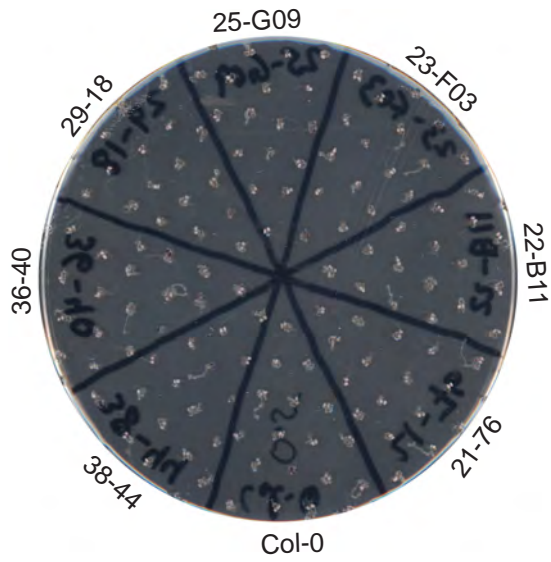

0.15 mM lincomycin

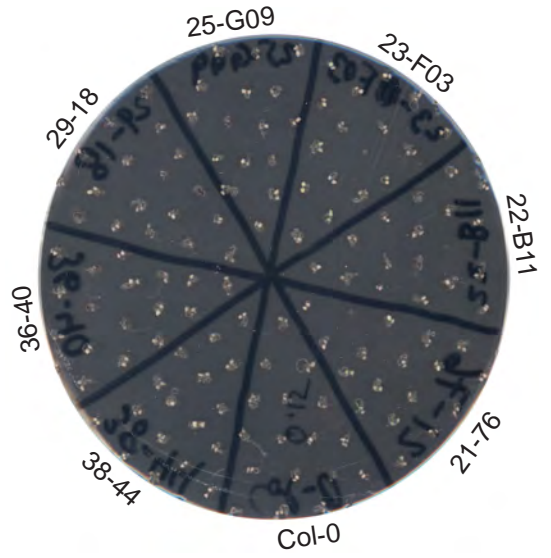

0.05 mM lincomycin

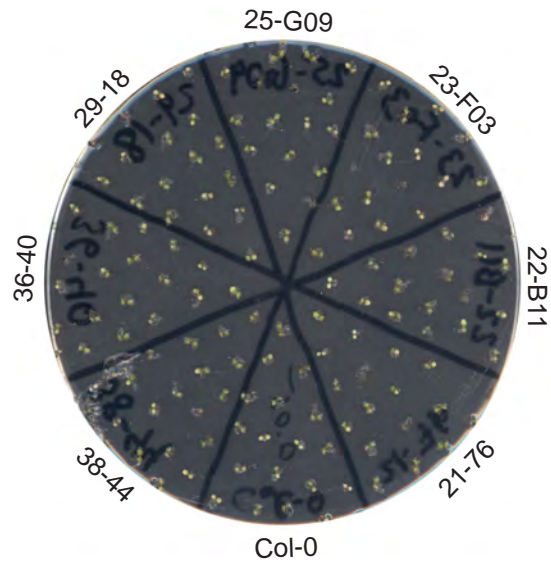

0.015 mM lincomycin

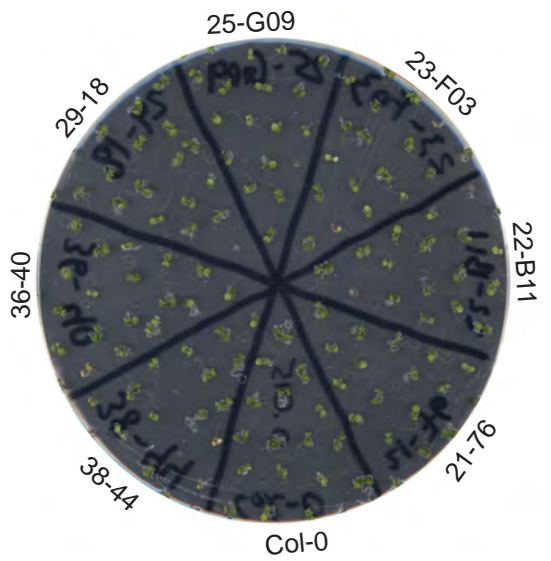

0.005 mM lincomycin

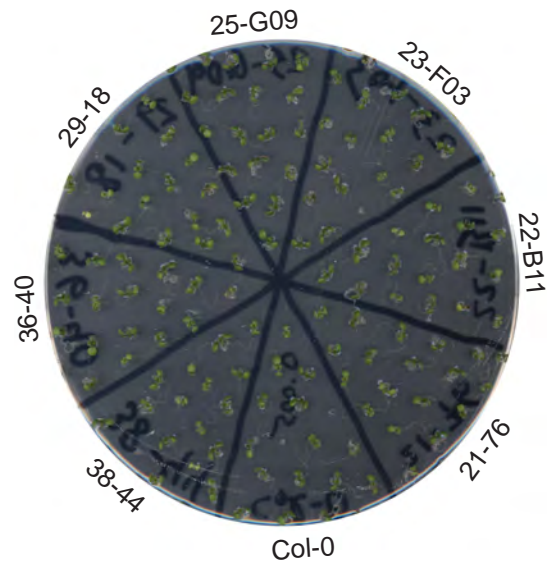

No lincomycin

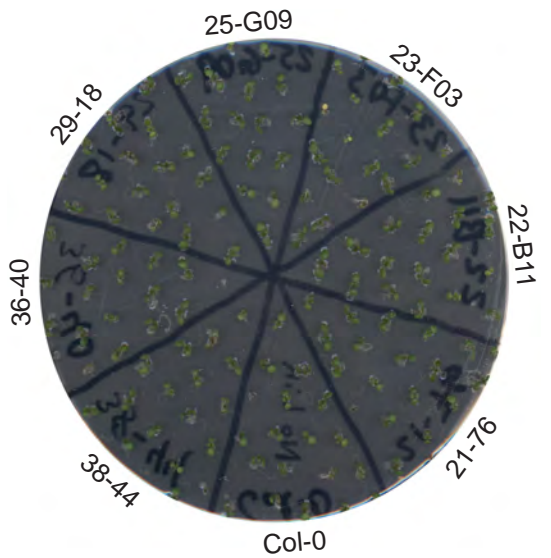

**Supplemental Figure S16.** 21-76, 22-B11, 23-F03, 25-G09, 29-18, 36-40, and 38-44 treated with various concentrations of lincomycin. The indicated *end* mutants were grown for 8 d in continuous white light at a fluence rate of  $100 \mu\text{mol m}^{-2} \text{s}^{-1}$  on media containing the indicated concentrations of lincomycin.

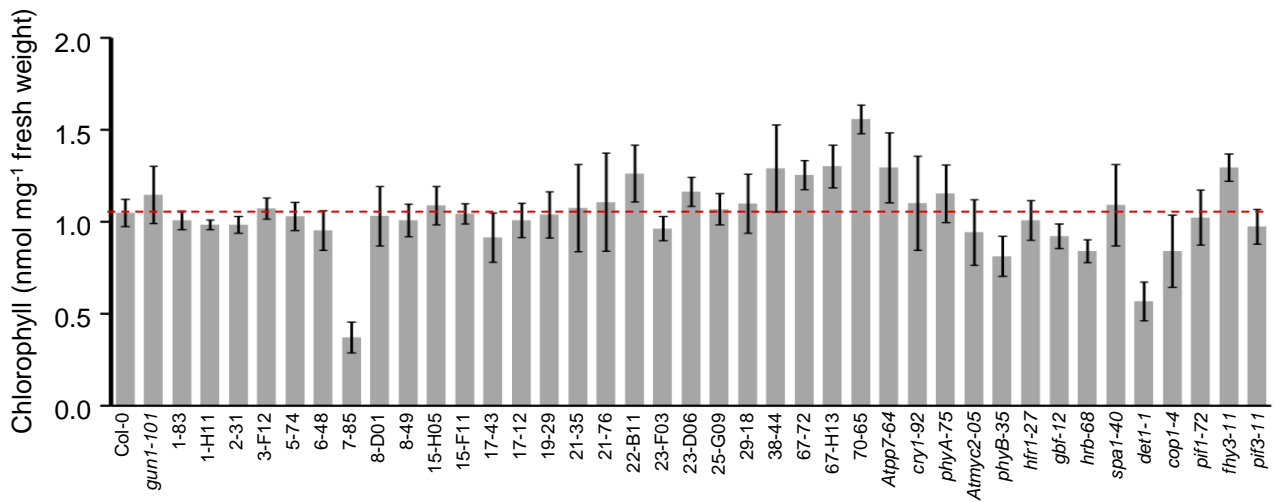

**Supplemental Figure S17.** Chlorophyll levels in *end* mutants and light signaling mutants grown in continuous white light. Mutants that accumulated significantly more or less chlorophyll than wild type (Col-0) during de-etiolation experiments (Figs. 7A and B; Figs. 8A and B; Supplemental Fig. S11) were grown for 7 d in continuous 125  $\mu\text{mol m}^{-2} \text{s}^{-1}$  broad spectrum white light. Chlorophyll was extracted and quantified from four biological replicates for wild type and each mutant. The mean level of chlorophyll in wild type is indicated with a red-dashed line. Error bars indicate 95% confidence intervals.

**Supplemental Table S1.** Significance of enriched biological process and cellular component GO terms in particular expression patterns

|                                      | GO Term | GO ID                                    | Enrichment in all genes | Expressed genes / Total genes in GO term | Light pattern of expression with the highest enrichment |                | Light cluster of expression with the highest enrichment |                | Plastid pattern of expression with the highest enrichment |                | Plastid cluster of expression with the highest enrichment |                |                       |
|--------------------------------------|---------|------------------------------------------|-------------------------|------------------------------------------|---------------------------------------------------------|----------------|---------------------------------------------------------|----------------|-----------------------------------------------------------|----------------|-----------------------------------------------------------|----------------|-----------------------|
|                                      |         |                                          |                         |                                          | p-value                                                 | Pattern number | p-value                                                 | Cluster letter | p-value                                                   | Pattern number | p-value                                                   | Cluster letter | p-value               |
| <b>Plastid</b>                       |         |                                          |                         |                                          |                                                         |                |                                                         |                |                                                           |                |                                                           |                |                       |
| 1                                    | P       | Photosynthesis                           | GO:0015979              | 8x10 <sup>-29</sup>                      | 74/90                                                   | 12             | 4x10 <sup>-15</sup>                                     | B              | 4x10 <sup>-21</sup>                                       | 25             | 3x10 <sup>-34</sup>                                       | Q              | 2x10 <sup>-35</sup>   |
| 2                                    | C       | Thylakoid lumen                          | GO:0031977              | 5x10 <sup>-17</sup>                      | 45/48                                                   | 12             | 2x10 <sup>-17</sup>                                     | B              | 1x10 <sup>-27</sup>                                       | 23             | 4x10 <sup>-33</sup>                                       | Q              | 2x10 <sup>-23</sup>   |
| 3                                    | C       | Photosystem II                           | GO:0009523              | 8x10 <sup>-14</sup>                      | 14/15                                                   | 12             | 8x10 <sup>-5</sup>                                      | B              | 1x10 <sup>-6</sup>                                        | 25             | 1x10 <sup>-27</sup>                                       | Q              | 3x10 <sup>-23</sup>   |
| 4                                    | C       | Thylakoid membrane                       | GO:0042651              | 9x10 <sup>-20</sup>                      | 48/64                                                   | 12             | 8x10 <sup>-17</sup>                                     | B              | 4x10 <sup>-20</sup>                                       | 23             | 3x10 <sup>-26</sup>                                       | Q              | 3x10 <sup>-26</sup>   |
| 5                                    | C       | Plastid stroma                           | GO:0009532              | 1x10 <sup>-16</sup>                      | 80/117                                                  | 34             | 2x10 <sup>-11</sup>                                     | B              | 5x10 <sup>-21</sup>                                       | 23             | 7x10 <sup>-17</sup>                                       | N              | 7x10 <sup>-13</sup>   |
| 6                                    | C       | Plastoglobule                            | GO:0010287              | 3x10 <sup>-15</sup>                      | 49/56                                                   | 12             | 6x10 <sup>-8</sup>                                      | B              | 4x10 <sup>-13</sup>                                       | 21             | 1x10 <sup>-13</sup>                                       | Q              | 5x10 <sup>-20</sup>   |
| 7                                    | C       | Photosystem I                            | GO:0009522              | 1x10 <sup>-5</sup>                       | 8/9                                                     | 32             | 1.20x10 <sup>-4</sup>                                   | B              | 4x10 <sup>-5</sup>                                        | 22             | 7x10 <sup>-14</sup>                                       | Q              | 4x10 <sup>-15</sup>   |
| 8                                    | C       | Stromule                                 | GO:0010319              | 5x10 <sup>-5</sup>                       | 22/33                                                   | 12             | 1x10 <sup>-9</sup>                                      | B              | 2x10 <sup>-13</sup>                                       | 21             | 7x10 <sup>-9</sup>                                        | Q              | 2x10 <sup>-6</sup>    |
| 9                                    | C       | NAD(P)H dehydro-genase complex           | GO:0010598              | 8x10 <sup>-5</sup>                       | 9/9                                                     | 12             | 2x10 <sup>-7</sup>                                      | Y              | 1x10 <sup>-9</sup>                                        | 22             | 1x10 <sup>-10</sup>                                       | Q              | 2x10 <sup>-11</sup>   |
| 10                                   | P       | Tetrapyrrole metabolic process           | GO:0033013              | 6x10 <sup>-6</sup>                       | 38/61                                                   | 12             | 5x10 <sup>-6</sup>                                      | B              | 2x10 <sup>-10</sup>                                       | 23             | 1x10 <sup>-6</sup>                                        | P              | 3x10 <sup>-6</sup>    |
| 11                                   | P       | Plastid organization                     | GO:0009657              | 5x10 <sup>-6</sup>                       | 49/84                                                   | 30             | 2x10 <sup>-7</sup>                                      | Z              | 7x10 <sup>-10</sup>                                       | 21             | 1.66x10 <sup>-4</sup>                                     | N              | 7x10 <sup>-9</sup>    |
| 12                                   | P       | Carotenoid metabolic process             | GO:0016116              | 7.41x10 <sup>-4</sup>                    | 16/24                                                   | N/A            | N/A                                                     | B              | 1x10 <sup>-7</sup>                                        | N/A            | N/A                                                       | N              | 9x10 <sup>-5</sup>    |
| 13                                   | C       | Plastid ribosome                         | GO:0009547              | 3.55x10 <sup>-4</sup>                    | 16/24                                                   | N/A            | N/A                                                     | EE             | 2x10 <sup>-7</sup>                                        | N/A            | N/A                                                       | J              | 4x10 <sup>-5</sup>    |
| 14                                   | C       | Plastid chromosome                       | GO:0009508              | 1.95x10 <sup>-4</sup>                    | 13/16                                                   | 10             | 1x10 <sup>-6</sup>                                      | Y              | 1x10 <sup>-5</sup>                                        | 25             | 1.26x10 <sup>-2</sup>                                     | N              | 1x10 <sup>-5</sup>    |
| 15                                   | C       | Plastid membrane                         | GO:0042170              | 2.82x10 <sup>-3</sup>                    | 57/104                                                  | N/A            | N/A                                                     | Z              | 2x10 <sup>-6</sup>                                        | N/A            | N/A                                                       | P              | 2x10 <sup>-6</sup>    |
| <b>Translation</b>                   |         |                                          |                         |                                          |                                                         |                |                                                         |                |                                                           |                |                                                           |                |                       |
| 1                                    | P       | Translation                              | GO:0006412              | 2x10 <sup>-6</sup>                       | 32/59                                                   | 32             | 5x10 <sup>-24</sup>                                     | E              | 1x10 <sup>-19</sup>                                       | 23             | 7.08x10 <sup>-3</sup>                                     | N              | 9x10 <sup>-23</sup>   |
| 2                                    | C       | Cytosolic ribosome                       | GO:0022626              | 1.91x10 <sup>-1</sup>                    | 70/181                                                  | 32             | 1x10 <sup>-21</sup>                                     | E              | 6x10 <sup>-18</sup>                                       | 24             | 4.57x10 <sup>-1</sup>                                     | N              | 3x10 <sup>-12</sup>   |
| 3                                    | P       | Ribosome biogenesis                      | GO:0042254              | 2x10 <sup>-5</sup>                       | 8/10                                                    | 32             | 1x10 <sup>-12</sup>                                     | E              | 8x10 <sup>-8</sup>                                        | 23             | 3.72x10 <sup>-4</sup>                                     | N              | 2x10 <sup>-8</sup>    |
| <b>Growth and development</b>        |         |                                          |                         |                                          |                                                         |                |                                                         |                |                                                           |                |                                                           |                |                       |
| 1                                    | P       | Cell cycle                               | GO:0007049              | 7.41x10 <sup>-1</sup>                    | 39/123                                                  | N/A            | N/A                                                     | EE             | 9x10 <sup>-7</sup>                                        | N/A            | N/A                                                       | K              | 4.79x10 <sup>-3</sup> |
| 2                                    | P       | Embryonic development                    | GO:0009790              | 1.62x10 <sup>-1</sup>                    | 123/326                                                 | N/A            | N/A                                                     | Z              | 1x10 <sup>-5</sup>                                        | N/A            | N/A                                                       | N              | 2.88x10 <sup>-1</sup> |
| 3                                    | C       | Cell wall                                | GO:0005618              | 1.05x10 <sup>-1</sup>                    | 64/123                                                  | 31             | 2.57x10 <sup>-1</sup>                                   | N/A            | N/A                                                       | 18             | 2x10 <sup>-5</sup>                                        | N/A            | N/A                   |
| 4                                    | P       | Cell wall modification                   | GO:0042545              | 1.23x10 <sup>-1</sup>                    | 27/61                                                   | N/A            | N/A                                                     | CC             | 1.66x10 <sup>-3</sup>                                     | N/A            | N/A                                                       | K              | 7x10 <sup>-6</sup>    |
| 5                                    | P       | DNA replication                          | GO:0006260              | 6.31x10 <sup>-2</sup>                    | 21/43                                                   | 27             | 4x10 <sup>-6</sup>                                      | DD             | 9x10 <sup>-5</sup>                                        | 28             | 7x10 <sup>-7</sup>                                        | K              | 4x10 <sup>-6</sup>    |
| 6                                    | P       | Regulation of post-embryonic development | GO:0048580              | 1.58x10 <sup>-2</sup>                    | 57/135                                                  | N/A            | N/A                                                     | GG             | 1x10 <sup>-5</sup>                                        | N/A            | N/A                                                       | M              | 3.31x10 <sup>-4</sup> |
| <b>Regulation of gene expression</b> |         |                                          |                         |                                          |                                                         |                |                                                         |                |                                                           |                |                                                           |                |                       |
| 1                                    | P       | Regulation of transcription              | GO:0045449              | 9.33x10 <sup>-1</sup>                    | 206/558                                                 | 4              | 9x10 <sup>-7</sup>                                      | R              | 4x10 <sup>-10</sup>                                       | 21             | 3.16x10 <sup>-1</sup>                                     | M              | 2x10 <sup>-5</sup>    |
| 2                                    | P       | Cellular protein catabolic process       | GO:0044257              | 3.02x10 <sup>-1</sup>                    | 56/134                                                  | 33             | 4x10 <sup>-7</sup>                                      | GG             | 3x10 <sup>-7</sup>                                        | 20             | 7.94x10 <sup>-4</sup>                                     | L              | 1.86x10 <sup>-4</sup> |
| 2                                    | C       | Ubiquitin ligase complex                 | GO:0000151              | 1.66x10 <sup>-2</sup>                    | 19/42                                                   | 16             | 2x10 <sup>-5</sup>                                      | GG             | 1.12x10 <sup>-2</sup>                                     | 20             | 1x10 <sup>-7</sup>                                        | L              | 3x10 <sup>-6</sup>    |
| 3                                    | P       | RNA processing                           | GO:0006396              | 7x10 <sup>-6</sup>                       | 47/96                                                   | 6              | 7x10 <sup>-6</sup>                                      | GG             | 6x10 <sup>-7</sup>                                        | 21             | 5.25x10 <sup>-1</sup>                                     | O              | 3x10 <sup>-5</sup>    |
| <b>Metabolism</b>                    |         |                                          |                         |                                          |                                                         |                |                                                         |                |                                                           |                |                                                           |                |                       |
| 1                                    | P       | Carbon utilization                       | GO:0015976              | 3.31x10 <sup>-4</sup>                    | 11/13                                                   | 12             | 1.05x10 <sup>-3</sup>                                   | Y              | 6.31x10 <sup>-4</sup>                                     | 21             | 8x10 <sup>-8</sup>                                        | Q              | 3x10 <sup>-6</sup>    |
| 3                                    | P       | Cellular amino acid metabolism           | GO:0006520              | 3x10 <sup>-7</sup>                       | 59/113                                                  | 34             | 1x10 <sup>-6</sup>                                      | E              | 3x10 <sup>-6</sup>                                        | 22             | 2.10x10 <sup>-3</sup>                                     | N              | 4x10 <sup>-5</sup>    |
| 4                                    | P       | Lipid transport                          | GO:0006869              | 4.79x10 <sup>-4</sup>                    | 9/16                                                    | N/A            | N/A                                                     | F              | 3x10 <sup>-7</sup>                                        | N/A            | N/A                                                       | J              | 9x10 <sup>-7</sup>    |
| 5                                    | P       | Starch metabolic process                 | GO:005982               | 1.23x10 <sup>-3</sup>                    | 21/33                                                   | 32             | 2.45x10 <sup>-4</sup>                                   | N/A            | N/A                                                       | 23             | 3x10 <sup>-6</sup>                                        | N/A            | N/A                   |
| 6                                    | P       | Monosaccharide metabolic process         | GO:0005996              | 6.61x10 <sup>-4</sup>                    | 22/45                                                   | 30             | 4x10 <sup>-6</sup>                                      | B              | 8x10 <sup>-6</sup>                                        | 21             | 3.72x10 <sup>-4</sup>                                     | P              | 1.82x10 <sup>-3</sup> |
| <b>Other cellular components</b>     |         |                                          |                         |                                          |                                                         |                |                                                         |                |                                                           |                |                                                           |                |                       |
| 1                                    | C       | Endoplasmic reticulum                    | GO:0005783              | 2.00x10 <sup>-1</sup>                    | 103/267                                                 | N/A            | N/A                                                     | H              | 1x10 <sup>-5</sup>                                        | N/A            | N/A                                                       | J              | 2.88x10 <sup>-2</sup> |
| 2                                    | C       | Mitochondrion                            | GO:0005739              | 8x10 <sup>-5</sup>                       | 232/551                                                 | 32             | 2x10 <sup>-9</sup>                                      | Z              | 6x10 <sup>-16</sup>                                       | 29             | 4.72x10 <sup>-2</sup>                                     | J              | 2x10 <sup>-5</sup>    |

Testing for the enrichment of GO terms was described in Materials and Methods, Fig. 2, Supplemental Figs. S2, S3, S4, and S5. Enrichment in all genes refers to the significance of enrichment of a particular GO term in the entire dataset of 7104 genes. Ontologizer 2.0 was used to calculate the indicated p-values. The ratio of genes in our dataset that are associated with a particular GO term to the total number of genes that are associated with that same GO term is presented for each GO term. The most significantly enriched light- and plastid-regulated expression pattern and cluster is indicated for each GO term. If a particular pattern or cluster was not significantly enriched (p<0.01), a p-value is not presented (N/A).

**Supplemental Table S2.** Significance of enriched biological process and response to stimulus GO terms in particular expression patterns

| GO Term                                    | GO ID | Enrichment in all genes            | Expressed genes / Total genes in GO term | Light pattern of expression with the highest enrichment |                | Light cluster of expression with the highest enrichment |                       | Plastid pattern of expression with the highest enrichment |                       | Plastid cluster of expression with the highest enrichment |                       |   |                       |
|--------------------------------------------|-------|------------------------------------|------------------------------------------|---------------------------------------------------------|----------------|---------------------------------------------------------|-----------------------|-----------------------------------------------------------|-----------------------|-----------------------------------------------------------|-----------------------|---|-----------------------|
|                                            |       |                                    |                                          | p-value                                                 | Pattern number | p-value                                                 | Cluster letter        | p-value                                                   | Pattern number        | p-value                                                   | Cluster letter        |   |                       |
| <b>Oxidative Stress and ROS scavenging</b> |       |                                    |                                          |                                                         |                |                                                         |                       |                                                           |                       |                                                           |                       |   |                       |
| 1                                          | R     | Oxidative stress                   | GO:0006979                               | 6x10 <sup>-10</sup>                                     | 102/173        | 34                                                      | 3.16x10 <sup>-4</sup> | I                                                         | 1x10 <sup>-5</sup>    | 21                                                        | 8x10 <sup>-6</sup>    | O | 5.13x10 <sup>-4</sup> |
| 2                                          | P     | Phenyl propanoid Metabolic process | GO:0009698                               | 4x10 <sup>-5</sup>                                      | 43/82          | N/A                                                     | N/A                   | AA                                                        | 1x10 <sup>-9</sup>    | N/A                                                       | N/A                   | J | 2.45x10 <sup>-6</sup> |
| 3                                          | P     | Glycoside metabolic process        | GO:0016137                               | 3x10 <sup>-4</sup>                                      | 30/48          | 16                                                      | 1x10 <sup>-6</sup>    | AA                                                        | 1x10 <sup>-6</sup>    | 18                                                        | 1x10 <sup>-7</sup>    | K | 3x10 <sup>-6</sup>    |
| 4                                          | P     | Cell death                         | GO:0008219                               | 1.86x10 <sup>-3</sup>                                   | 44/80          | N/A                                                     | N/A                   | FF                                                        | 4x10 <sup>-7</sup>    | N/A                                                       | N/A                   | M | 2.09x10 <sup>-2</sup> |
| <b>Biotic and Abiotic stress</b>           |       |                                    |                                          |                                                         |                |                                                         |                       |                                                           |                       |                                                           |                       |   |                       |
| 1                                          | R     | Heat                               | GO:0009408                               | 4x10 <sup>-8</sup>                                      | 57/99          | 6                                                       | 1x10 <sup>-6</sup>    | C                                                         | 8x10 <sup>-25</sup>   | 20                                                        | 3.16x10 <sup>-3</sup> | M | 1.82x10 <sup>-3</sup> |
| 2                                          | R     | Cold                               | GO:0009409                               | 1x10 <sup>-13</sup>                                     | 128/216        | 34                                                      | 1x10 <sup>-7</sup>    | S                                                         | 4x10 <sup>-5</sup>    | 22                                                        | 5x10 <sup>-5</sup>    | J | 2x10 <sup>-6</sup>    |
| 3                                          | R     | Water deprivation                  | GO:0009414                               | 2x10 <sup>-13</sup>                                     | 97/145         | 34                                                      | 6x10 <sup>-9</sup>    | H                                                         | 2x10 <sup>-8</sup>    | 20                                                        | 6x10 <sup>-10</sup>   | J | 2x10 <sup>-8</sup>    |
| 4                                          | R     | Salt stress                        | GO:0009651                               | 6x10 <sup>-12</sup>                                     | 117/202        | 33                                                      | 5x10 <sup>-6</sup>    | H                                                         | 3x10 <sup>-8</sup>    | 20                                                        | 8x10 <sup>-5</sup>    | M | 2x10 <sup>-7</sup>    |
| 5                                          | R     | Wounding                           | GO:0009611                               | 1x10 <sup>-7</sup>                                      | 67/114         | 15                                                      | 6x10 <sup>-5</sup>    | CC                                                        | 3.24x10 <sup>-3</sup> | 22                                                        | 2.69x10 <sup>-3</sup> | J | 6.76x10 <sup>-4</sup> |
| 6                                          | R     | Carbohydrate stimulus              | GO:0009743                               | 4x10 <sup>-7</sup>                                      | 93/174         | 15                                                      | 2x10 <sup>-6</sup>    | D                                                         | 1x10 <sup>-5</sup>    | 20                                                        | 3.02x10 <sup>-2</sup> | M | 7x10 <sup>-6</sup>    |
| 7                                          | R     | Metal ion                          | GO:0010038                               | 9x10 <sup>-6</sup>                                      | 44/70          | 11                                                      | 2.24x10 <sup>-3</sup> | D                                                         | 6x10 <sup>-5</sup>    | 25                                                        | 2.14x10 <sup>-2</sup> | M | 1.26x10 <sup>-3</sup> |
| <b>Light</b>                               |       |                                    |                                          |                                                         |                |                                                         |                       |                                                           |                       |                                                           |                       |   |                       |
| 1                                          | R     | UV light                           | GO:0009411                               | 5x10 <sup>-7</sup>                                      | 38/55          | 4                                                       | 2x10 <sup>-6</sup>    | AA                                                        | 4x10 <sup>-16</sup>   | 20                                                        | 4x10 <sup>-5</sup>    | K | 3.02x10 <sup>-2</sup> |
| 2                                          | R     | High light intensity               | GO:0009644                               | 3x10 <sup>-10</sup>                                     | 34/41          | 4                                                       | 8x10 <sup>-5</sup>    | C                                                         | 1x10 <sup>-9</sup>    | 21                                                        | 9x10 <sup>-6</sup>    | P | 1x10 <sup>-7</sup>    |
| 3                                          | R     | Red and far-red light              | GO:0009639                               | 6x10 <sup>-6</sup>                                      | 77/129         | 4                                                       | 2x10 <sup>-6</sup>    | R                                                         | 2x10 <sup>-7</sup>    | 21                                                        | 3x10 <sup>-8</sup>    | M | 9x10 <sup>-6</sup>    |
| 4                                          | R     | Blue light                         | GO:0009637                               | 1x10 <sup>-6</sup>                                      | 30/44          | 4                                                       | 8.71x10 <sup>-4</sup> | U                                                         | 1.38x10 <sup>-3</sup> | 21                                                        | 3.98x10 <sup>-4</sup> | Q | 8x10 <sup>-5</sup>    |
| 5                                          | P     | Circadian rhythm                   | GO:0007623                               | 6x10 <sup>-6</sup>                                      | 30/43          | 33                                                      | 1.66x10 <sup>-4</sup> | BB                                                        | 1.51x10 <sup>-4</sup> | 21                                                        | 8x10 <sup>-5</sup>    | L | 4.37x10 <sup>-4</sup> |
| <b>Hormones</b>                            |       |                                    |                                          |                                                         |                |                                                         |                       |                                                           |                       |                                                           |                       |   |                       |
| 1                                          | R     | Abscisic acid stimulus             | GO:0009737                               | 4x10 <sup>-12</sup>                                     | 137/245        | 17                                                      | 2x10 <sup>-6</sup>    | H                                                         | 9x10 <sup>-9</sup>    | 20                                                        | 6x10 <sup>-8</sup>    | J | 9x10 <sup>-9</sup>    |
| 2                                          | R     | Auxin stimulus                     | GO:0009733                               | 3.02x10 <sup>-3</sup>                                   | 76/169         | 3                                                       | 2x10 <sup>-6</sup>    | X                                                         | 7x10 <sup>-11</sup>   | 21                                                        | 1.95x10 <sup>-3</sup> | M | 2x10 <sup>-9</sup>    |
| 3                                          | R     | Jasmonic acid stimulus             | GO:0009753                               | 1x10 <sup>-8</sup>                                      | 80/140         | 2                                                       | 1.10x10 <sup>-4</sup> | T                                                         | 1x10 <sup>-5</sup>    | 23                                                        | 1.86x10 <sup>-3</sup> | J | 1.51x10 <sup>-4</sup> |
| 5                                          | R     | Gibberellin stimulus               | GO:0009739                               | 3x10 <sup>-8</sup>                                      | 59/99          | 11                                                      | 9x10 <sup>-6</sup>    | H                                                         | 4x10 <sup>-7</sup>    | 20                                                        | 2.35x10 <sup>-3</sup> | L | 2.00x10 <sup>-3</sup> |

Testing for the enrichment of GO terms was described in Materials and Methods, Fig. 2, Supplemental Figs. S2, S3, S4, and S5. Enrichment in all genes refers to the significance of enrichment of a particular GO term in the entire dataset of 7104 genes. Ontologizer 2.0 was used to calculate the indicated p-values. The ratio of genes in our dataset that are associated with a particular GO term to the total number of genes that are associated with that same GO term is presented for each GO term. The most significantly enriched light- and plastid-regulated expression pattern and cluster is presented for each GO term. If a particular pattern or cluster was not significantly enriched ( $p < 0.01$ ), a p-value is not presented (N/A).

**Supplemental Table S3.** Genes that exhibit enhanced light-induced expression in lincomycin-treated seedlings and that lack publicly available T-DNA alleles

| Number | Arabidopsis Genome Initiative (AGI) Identifier | Light Induction | Plastid regulation | Name/Description                                       | Biological function, process, and location                                                                                   |
|--------|------------------------------------------------|-----------------|--------------------|--------------------------------------------------------|------------------------------------------------------------------------------------------------------------------------------|
| 4      | At1g14345                                      | 2.45            | -5.92              | Aldo/keto reductase domain                             | Oxidation reduction <sup>IEA</sup> , Chloroplast thylakoid membrane <sup>a</sup>                                             |
| 9      | At1g11380                                      | 2.06            | -1.80              | Cys-rich domain                                        | Unknown                                                                                                                      |
| 12     | At3g49580                                      | 1.98            | -1.67              | LSU1, RESPONSE TO LOW SULFUR 1                         | Unknown                                                                                                                      |
| 18     | At2g30520                                      | 1.87            | -1.21              | RPT2, ROOT PHOTOTROPISM 2 <sup>b</sup>                 | Phototropism <sup>b</sup> , Nucleus <sup>ISS</sup>                                                                           |
| 24     | At5g47610                                      | 1.76            | -3.56              | Zinc finger (C3HC4-type RING finger)                   | Protein binding <sup>ISS</sup>                                                                                               |
| 26     | At2g42540                                      | 1.73            | 5.80               | COR15A, COLD-REGULATED 15A                             | Cold acclimation <sup>c</sup> , Chloroplast <sup>d</sup>                                                                     |
| 27     | At1g12250                                      | 1.73            | -2.48              | Expressed protein                                      | Chloroplast thylakoid membrane <sup>a</sup>                                                                                  |
| 30     | At1g16720                                      | 1.68            | -2.19              | HCF173, HIGH CHLOROPHYLL FLUORESCENCE 173 <sup>e</sup> | Translational initiation <sup>e</sup> , Photosystem II assembly <sup>e</sup> , Chloroplast <sup>f</sup>                      |
| 31     | At1g42550                                      | 1.65            | -3.08              | PMI1, PLASTID MOVEMENT IMPAIRED1 <sup>g</sup>          | Chloroplast relocation <sup>g</sup> , Plasma membrane <sup>h</sup>                                                           |
| 32     | At1g79270                                      | 1.65            | -1.68              | ECT8, EVOLUTIONARILY CONSERVED C-TERMINAL REGION 8     | Unknown                                                                                                                      |
| 33     | At1g32080                                      | 1.64            | -6.56              | LrgB-like domain protein                               | Chloroplast inner membrane <sup>i</sup>                                                                                      |
| 34     | At5g49330                                      | 1.57            | 1.38               | ATMYB111, MYB DOMAIN PROTEIN 111                       | Transcription factor activity <sup>ISS</sup>                                                                                 |
| 37     | At2g02950                                      | 1.52            | 1.17               | PKS1, PHYTOCHROME KINASE SUBSTRATE 1                   | Phototropism <sup>l</sup> , Red-far red light signaling <sup>k</sup> , Cytoplasm <sup>k</sup> , Plasma membrane <sup>j</sup> |

Thirteen genes are ranked by their light induction. Light induction is defined as the ratio of light-induced expression in lincomycin-treated seedlings to light-induced expression in untreated seedlings at 1 h following the BR-fluence-rate shift. Plastid regulation is represented as the ratio of induced or repressed (-) expression in lincomycin-treated seedlings to expression in untreated seedlings at 0 h relative to the BR-fluence-rate shift. Gene names and descriptions are based on available literature or on TIGR gene annotation records. Biological function, process, and location are based on the current literature or the gene ontology with evidence codes as described in Materials and Methods. References: a (Peltier et al., 2004); b (Sakai et al., 2000); c (Lin and Thomashow, 1992); d (Kleffmann et al., 2004); e (Schult et al., 2007); f (Zybailov et al., 2008); g (DeBlasio et al., 2005); h (Nühse et al., 2003); i (Ferro et al., 2003); j (Lariguet et al., 2006); k (Fankhauser et al., 1999).



**Supplemental Table S4.** Alleles of genes that exhibit similar light-induced expression in lincomycin-treated and untreated seedlings that cause *end* phenotypes

| No. | AGI code  | Light Induction | Plastid regulation | Name/Description                       | Biological function, process, and location                                                                                         | T-DNA line(s)               | Transcript phenotype in the homozygote |
|-----|-----------|-----------------|--------------------|----------------------------------------|------------------------------------------------------------------------------------------------------------------------------------|-----------------------------|----------------------------------------|
| 67  | At5g59220 | 1.20            | -0.10              | HAI1, HIGHLY ABA-INDUCED PP2C GENE 1   | Chloroplast <sup>EA</sup> , protein serine/threonine phosphatase activity <sup>SS</sup> , ABA signaling <sup>a-c</sup>             | Salk_142672<br>SAIL_520_H12 | Null<br>Upregulated                    |
| 70  | At5g23730 | 0.83            | -0.64              | RUP2/EFO2, WD-40 repeat family protein | UV-B signaling <sup>d</sup> , vegetative development and flowering <sup>e</sup> , CUL4 RING ubiquitin ligase complex <sup>SS</sup> | Salk_015765                 | Knockdown                              |

The light induction and the plastid regulation were calculated as described in Supplemental Table S3. Gene names and descriptions are based on available literature or on TIGR gene annotation records. Biological function, process, and location are based on the current literature or the gene ontology with evidence codes as described in Materials and Methods. References: a(Fujita et al., 2009); b(Guo et al., 2010); c(Antoni et al., 2012); d(Gruber et al., 2010); e(Wang et al., 2011).

**Supplemental Table S5.** The diverse regulators of genes that exhibit enhanced light-induced expression in lincomycin-treated seedlings

| Number | AGI Code  | Regulators of gene expression                                                                                                                                                                                                                                                          |
|--------|-----------|----------------------------------------------------------------------------------------------------------------------------------------------------------------------------------------------------------------------------------------------------------------------------------------|
| 1      | At5g24120 | Far-red light <sup>E,1</sup> , Red light <sup>E,1</sup> , UV-B <sup>M,2</sup> , Plastid signals <sup>SS,3</sup> , Blue light <sup>E,4</sup>                                                                                                                                            |
| 2      | At3g56290 | UV-B <sup>M,2</sup>                                                                                                                                                                                                                                                                    |
| 3      | At2g30040 | Nitrogen <sup>E,5</sup> , Far-red light <sup>E,1</sup> , Red light <sup>E,1</sup> , Brassinosteroid <sup>E,6</sup> , Auxin <sup>E,6</sup> , Cold <sup>E,7</sup>                                                                                                                        |
| 5      | At5g08050 | NA                                                                                                                                                                                                                                                                                     |
| 6      | At5g24660 | Sulfur <sup>M,L,8</sup>                                                                                                                                                                                                                                                                |
| 7      | At3g17040 | Red light <sup>E,9</sup>                                                                                                                                                                                                                                                               |
| 8      | At1g44000 | NA                                                                                                                                                                                                                                                                                     |
| 10     | At2g24540 | Salt <sup>M,10</sup> , Osmotic <sup>M,10</sup> , Cold <sup>M,10</sup> , Circadian clock <sup>11</sup> , UV-B <sup>E,12</sup>                                                                                                                                                           |
| 11     | At5g35970 | High light <sup>M,13</sup> , UV-B <sup>E,12</sup>                                                                                                                                                                                                                                      |
| 13     | At4g11360 | Phenylglycosides <sup>E,14</sup> , Sucrose starvation <sup>L,15</sup> , Immune response to flg22E <sup>16</sup> , Sucrose addition <sup>E,17</sup> , Chitin <sup>E,18</sup>                                                                                                            |
| 14     | At5g14970 | NA                                                                                                                                                                                                                                                                                     |
| 15     | At5g58650 | NA                                                                                                                                                                                                                                                                                     |
| 16     | At2g41660 | UV-B <sup>E,12</sup>                                                                                                                                                                                                                                                                   |
| 17     | At5g13770 | NA                                                                                                                                                                                                                                                                                     |
| 19     | At2g16365 | NA                                                                                                                                                                                                                                                                                     |
| 20     | At5g52780 | NA                                                                                                                                                                                                                                                                                     |
| 21     | At3g54990 | Photoperiod <sup>19</sup> , Nitrogen <sup>E,5</sup>                                                                                                                                                                                                                                    |
| 22     | At5g62430 | Circadian clock <sup>20</sup>                                                                                                                                                                                                                                                          |
| 23     | At3g02380 | Reactive oxygen <sup>SS,21</sup> , Far-red light <sup>E,1</sup> , Red light <sup>E,1</sup>                                                                                                                                                                                             |
| 25     | At1g43160 | Wounding <sup>E,22</sup> , Intense light <sup>E,23</sup> , Brassinosteroid <sup>E,6</sup> , Auxin <sup>E,6</sup> , Drought <sup>L,24</sup> , Cytokinin <sup>E,25</sup> , Cold <sup>M,26</sup> , Blue light <sup>E,27</sup> , Far-red light <sup>E,28</sup> , Red light <sup>E,28</sup> |
| 28     | At5g52250 | Far-red light <sup>E,1</sup> , Red light <sup>E,1</sup> , UV-B <sup>E,29</sup> , High light <sup>M,13</sup>                                                                                                                                                                            |
| 29     | At1g04770 | Sulfur <sup>M,L,8</sup>                                                                                                                                                                                                                                                                |
| 35     | At2g33250 | NA                                                                                                                                                                                                                                                                                     |
| 36     | At2g46340 | Far-red light <sup>E,1</sup> , Red light <sup>E,1</sup> , Blue light <sup>E,30</sup> , Green light <sup>E,31</sup>                                                                                                                                                                     |
| 38     | At4g28740 | NA                                                                                                                                                                                                                                                                                     |

Only signals that both regulate the expression of these genes and are indicated in the text (including embedded tables) of the indicated references were considered. Large datasets provided in the supplemental material online were not considered. The kinetics of regulated expression is also provided: E, Early, 0-2 h; M, Mid, 2-8 h; L, Late, 8-24 h; SS, Steady State. References: 1 (Khanna et al., 2006); 2 (Brown et al., 2005); 3 (Ankele et al., 2007); 4 (Onda et al., 2008); 5 (Scheible et al., 2004); 6 (Goda et al., 2004); 7 (Lee et al., 2005); 8 (Maruyama-Nakashita et al., 2005); 9 (Monte et al., 2004); 10 (Kreps et al., 2002); 11 (Harmon and Kay, 2003); 12 (Oravecz et al., 2006); 13 (Kleine et al., 2007); 14 (Guan and Nothnagel, 2004); 15 (Contento et al., 2004); 16 (Navarro et al., 2004); 17 (Osuna et al., 2007); 18 (Libault et al., 2007); 19 (Schmid et al., 2003); 20 (Imaizumi et al., 2005); 21 (Charron et al., 2008); 22 (Yan et al., 2007); 23 (Rossel et al., 2007); 24 (Catala et al., 2007); 25 (Rashotte et al., 2003); 26 (Fowler and Thomashow, 2002); 27 (Folta et al., 2003); 28 (Tepperman et al., 2004); 29 (Ulm et al., 2004); 30 (Fittinghoff et al., 2006); 31 (Dhingra et al., 2006).

## SUPPLEMENTAL LITERATURE CITED

- Ankele E, Kindgren P, Pesquet E, Strand Å** (2007) In vivo visualization of Mg-protoporphyrin IX, a coordinator of photosynthetic gene expression in the nucleus and the chloroplast. *Plant Cell* **19**: 1964-1979
- Antoni R, Gonzalez-Guzman M, Rodriguez L, Rodrigues A, Pizzio GA, Rodriguez PL** (2012) Selective inhibition of clade A chosphatases type 2C by PYR/PYL/RCAR abscisic acid receptors. *Plant Physiol* **158**: 970-980
- Ballesteros ML, Bolle C, Lois LM, Moore JM, Vielle-Calzada JP, Grossniklaus U, Chua NH** (2001) LAF1, a MYB transcription activator for phytochrome A signaling. *Genes Dev* **15**: 2613-2625
- Bolle C, Koncz C, Chua NH** (2000) PAT1, a new member of the GRAS family, is involved in phytochrome A signal transduction. *Genes Dev* **14**: 1269-1278
- Brown BA, Cloix C, Jiang GH, Kaiserli E, Herzyk P, Kliebenstein DJ, Jenkins GI** (2005) A UV-B-specific signaling component orchestrates plant UV protection. *Proc Natl Acad Sci USA* **102**: 18225-18230
- Catala R, Ouyang J, Abreu IA, Hu Y, Seo H, Zhang X, Chua NH** (2007) The Arabidopsis E3 SUMO ligase SIZ1 regulates plant growth and drought responses. *Plant Cell* **19**: 2952-2966
- Charron JB, Ouellet F, Houde M, Sarhan F** (2008) The plant Apolipoprotein D ortholog protects Arabidopsis against oxidative stress. *BMC Plant Biol* **8**: 86
- Chen M, Ni M** (2006) RED AND FAR-RED INSENSITIVE 2, a RING-domain zinc finger protein, mediates phytochrome-controlled seedling deetiolation responses. *Plant Physiol* **140**: 457-465
- Chory J, Peto C, Feinbaum R, Pratt L, Ausubel FM** (1989) *Arabidopsis thaliana* mutant that develops as a light-grown plant in the absence of light. *Cell* **58**: 991-999
- Contento AL, Kim SJ, Bassham DC** (2004) Transcriptome profiling of the response of Arabidopsis suspension culture cells to Suc starvation. *Plant Physiol* **135**: 2330-2347
- DeBlasio SL, Luesse DL, Hangarter RP** (2005) A plant-specific protein essential for blue-light-induced chloroplast movements. *Plant Physiol* **139**: 101-114

- Deng XW, Matsui M, Wei N, Wagner D, Chu AM, Feldmann KA, Quail PH** (1992) *COP1*, an Arabidopsis regulatory gene, encodes a protein with both a zinc-binding motif and a G<sub>β</sub> homologous domain. *Cell* **71**: 791-801
- Deng XW, Quail PH** (1992) Genetic and phenotypic characterization of *cop1* mutants of *Arabidopsis thaliana*. *Plant J* **2**: 83-95
- Devlin PF, Patel SR, Whitelam GC** (1998) Phytochrome E influences internode elongation and flowering time in Arabidopsis. *Plant Cell* **10**: 1479-1487
- Dhingra A, Bies DH, Lehner KR, Folta KM** (2006) Green light adjusts the plastid transcriptome during early photomorphogenic development. *Plant Physiol* **142**: 1256-1266
- Dieterle M, Zhou YC, Schäfer E, Funk M, Kretsch T** (2001) EID1, an F-box protein involved in phytochrome A-specific light signaling. *Genes Dev* **15**: 939-944
- Fairchild CD, Schumaker MA, Quail PH** (2000) HFR1 encodes an atypical bHLH protein that acts in phytochrome A signal transduction. *Genes Dev* **14**: 2377-2391
- Fankhauser C, Yeh KC, Lagarias JC, Zhang H, Elich TD, Chory J** (1999) PKS1, a substrate phosphorylated by phytochrome that modulates light signaling in Arabidopsis. *Science* **284**: 1539-1541
- Ferro M, Salvi D, Brugière S, Miras S, Kowalski S, Louwagie M, Garin J, Joyard J, Rolland N** (2003) Proteomics of the chloroplast envelope membranes from *Arabidopsis thaliana*. *Mol Cell Proteomics* **2**: 325-345
- Fittinghoff K, Laubinger S, Nixdorf M, Fackendahl P, Baumgardt RL, Batschauer A, Hoecker U** (2006) Functional and expression analysis of Arabidopsis SPA genes during seedling photomorphogenesis and adult growth. *Plant J* **47**: 577-590
- Folta KM, Pontin MA, Karlin-Neumann G, Bottini R, Spalding EP** (2003) Genomic and physiological studies of early cryptochrome 1 action demonstrate roles for auxin and gibberellin in the control of hypocotyl growth by blue light. *Plant J* **36**: 203-214
- Fowler S, Thomashow MF** (2002) Arabidopsis transcriptome profiling indicates that multiple regulatory pathways are activated during cold acclimation in addition to the CBF cold response pathway. *Plant Cell* **14**: 1675-1690

- Fujita Y, Nakashima K, Yoshida T, Katagiri T, Kidokoro S, Kanamori N, Umezawa T, Fujita M, Maruyama K, Ishiyama K, Kobayashi M, Nakasone S, Yamada K, Ito T, Shinozaki K, Yamaguchi-Shinozaki K** (2009) Three SnRK2 protein kinases are the main positive regulators of abscisic acid signaling in response to water stress in *Arabidopsis*. *Plant Cell Physiol* **50**: 2123-2132
- Gadjev I, Vanderauwera S, Gechev TS, Laloi C, Minkov IN, Shulaev V, Apel K, Inzé D, Mittler R, Van Breusegem F** (2006) Transcriptomic footprints disclose specificity of reactive oxygen species signaling in *Arabidopsis*. *Plant Physiol* **141**: 436-445
- Goda H, Sawa S, Asami T, Fujioka S, Shimada Y, Yoshida S** (2004) Comprehensive comparison of auxin-regulated and brassinosteroid-regulated genes in *Arabidopsis*. *Plant Physiol* **134**: 1555-1573
- Grubera H, Heijdea M, Hellerc W, Albertd A, Seidlitzd HK, Ulma R** (2010) Negative feedback regulation of UV-B–induced photomorphogenesis and stress acclimation in *Arabidopsis*. *Proc Natl Acad Sci USA* **107**: 20132-20137
- Guan Y, Nothnagel EA** (2004) Binding of arabinogalactan proteins by Yariv phenylglycoside triggers wound-like responses in *Arabidopsis* cell cultures. *Plant Physiol* **135**: 1346-1366
- Guo XH, Deng KQ, Wang J, Yu DS, Zhao Q, Liu XM** (2010) Mutational analysis of *Arabidopsis PP2CA2* involved in abscisic acid signal transduction. *Mol Biol Rep* **37**: 763-769
- Harmon FG, Kay SA** (2003) The F box protein AFR is a positive regulator of phytochrome A-mediated light signaling. *Curr Biol* **13**: 2091-2096
- Hoecker U, Xu Y, Quail PH** (1998) SPA1: a new genetic locus involved in phytochrome A-specific signal transduction. *Plant Cell* **10**: 19-33
- Hsieh HL, Okamoto H, Wang M, Ang LH, Matsui M, Goodman H, Deng XW** (2000) *FIN219*, an auxin-regulated gene, defines a link between phytochrome A and the downstream regulator COP1 in light control of *Arabidopsis* development. *Genes Dev* **14**: 1958-1970

- Huala E, Oeller PW, Liscum E, Han I-S, Larsen E, Briggs WR** (1997) Arabidopsis NPH1: a protein kinase with a putative redox-sensing domain. *Science* **278**: 2120–2123
- Hudson M, Ringli C, Boylan MT, Quail PH** (1999) The *FAR1* locus encodes a novel nuclear protein specific to phytochrome A signaling. *Genes Dev* **13**: 2017-2027
- Huq E, Al-Sady B, Hudson M, Kim C, Apel K, Quail PH** (2004) Phytochrome-interacting factor 1 is a critical bHLH regulator of chlorophyll biosynthesis. *Science* **305**: 1937-1941
- Huq E, Quail PH** (2002) PIF4, a phytochrome-interacting bHLH factor, functions as a negative regulator of phytochrome B signaling in Arabidopsis. *EMBO J* **21**: 2441-2450
- Imaizumi T, Schultz TF, Harmon FG, Ho LA, Kay SA** (2005) FKF1 F-box protein mediates cyclic degradation of a repressor of *CONSTANS* in Arabidopsis. *Science* **309**: 293-297
- Kang X, Chong J, Ni M** (2005) HYPERSENSITIVE TO RED AND BLUE 1, a ZZ-type zinc finger protein, regulates phytochrome B-mediated red and cryptochrome-mediated blue light responses. *Plant Cell* **17**: 822-835
- Khanna R, Shen Y, Toledo-Ortiz G, Kikis EA, Johannesson H, Hwang YS, Quail PH** (2006) Functional profiling reveals that only a small number of phytochrome-regulated early-response genes in *Arabidopsis* are necessary for optimal deetiolation. *Plant Cell* **18**: 2157-2171
- Kim WY, Fujiwara S, Suh SS, Kim J, Kim Y, Han L, David K, Putterill J, Nam HG, Somers DE** (2007) ZEITLUPE is a circadian photoreceptor stabilized by GIGANTEA in blue light. *Nature* **449**: 356-360.
- Kleffmann T, Russenberger D, von Zychlinski A, Christopher W, Sjölander K, Gruissem W, Baginsky S** (2004) The *Arabidopsis thaliana* chloroplast proteome reveals pathway abundance and novel protein functions. *Curr Biol* **14**: 354-362
- Kleine T, Kindgren P, Benedict C, Hendrickson L, Strand Å** (2007) Genome-wide gene expression analysis reveals a critical role for CRYPTOCHROME1 in the response of Arabidopsis to high irradiance. *Plant Physiol* **144**: 1391-1406

- Kreps JA, Wu Y, Chang HS, Zhu T, Wang X, Harper JF** (2002) Transcriptome changes for Arabidopsis in response to salt, osmotic, and cold stress. *Plant Physiol* **130**: 2129-2141
- Lariguet P, Schepens I, Hodgson D, Pedmale UV, Trevisan M, Kami C, de Carbonnel M, Alonso JM, Ecker JR, Liscum E, Fankhauser C** (2006) PHYTOCHROME KINASE SUBSTRATE 1 is a phototropin 1 binding protein required for phototropism. *Proc Natl Acad Sci USA* **103**: 10134-10139
- Laubinger S, Fittinghoff K, Hoecker U** (2004) The SPA quartet: a family of WD-repeat proteins with a central role in suppression of photomorphogenesis in Arabidopsis. *Plant Cell* **16**: 2293-2306
- Lee BH, Henderson DA, Zhu JK** (2005) The Arabidopsis cold-responsive transcriptome and its regulation by ICE1. *Plant Cell* **17**: 3155-3175
- Libault M, Wan J, Czechowski T, Udvardi M, Stacey G** (2007) Identification of 118 Arabidopsis transcription factor and 30 ubiquitin-ligase genes responding to chitin, a plant-defense elicitor. *Mol Plant-Microbe Interact* **20**: 900-911
- Lin C, Thomashow MF** (1992) DNA sequence analysis of a complementary DNA for cold-regulated Arabidopsis gene *cor15* and characterization of the COR 15 polypeptide. *Plant Physiol* **99**: 519-525
- Liscum E, Briggs WR** (1995) Mutations in the *NPH1* locus disrupt the perception of phototropic stimuli. *Plant Cell* **7**: 473-485
- Maruyama-Nakashita A, Nakamura Y, Watanabe-Takahashi A, Inoue E, Yamaya T, Takahashi H** (2005) Identification of a novel cis-acting element conferring sulfur deficiency response in Arabidopsis roots. *Plant J.* **42**: 305-314
- Møller SG, Kim YS, Kunkel T, Chua NH** (2003) PP7 is a positive regulator of blue light signaling in Arabidopsis. *Plant Cell* **15**: 1111-1119
- Møller SG, Kunkel T, Chua NH** (2001) A plastidic ABC protein involved in intercompartmental communication of light signaling. *Genes Dev* **15**: 90-103
- Monte E, Alonso JM, Ecker JR, Zhang Y, Li X, Young J, Austin-Phillips S, Quail PH** (2003) Isolation and characterization of *phyC* mutants in Arabidopsis reveals complex crosstalk between phytochrome signaling pathways. *Plant Cell* **15**: 1962-1980

- Monte E, Tepperman JM, Al-Sady B, Kaczorowski KA, Alonso JM, Ecker JR, Li X, Zhang Y, Quail PH** (2004) The phytochrome-interacting transcription factor, PIF3, acts early, selectively, and positively in light-induced chloroplast development. *Proc Natl Acad Sci USA* **101**: 16091-16098
- Navarro L, Zipfel C, Rowland O, Keller I, Robatzek S, Boller T, Jones JD** (2004) The transcriptional innate immune response to flg22. Interplay and overlap with Avr gene-dependent defense responses and bacterial pathogenesis. *Plant Physiol* **135**: 1113-1128
- Ni M, Tepperman JM, Quail PH** (1998) PIF3, a phytochrome-interacting factor necessary for normal photoinduced signal transduction, is a novel basic helix-loop-helix protein. *Cell* **95**: 657-667
- Nühse TS, Stensballe A, Jensen ON, Peck SC** (2003) Large-scale analysis of in vivo phosphorylated membrane proteins by immobilized metal ion affinity chromatography and mass spectrometry. *Mol Cell Proteomics* **2**: 1234-1243
- Onda Y, Yagi Y, Saito Y, Takenaka N, Toyoshima Y** (2008) Light induction of Arabidopsis *SIG1* and *SIG5* transcripts in mature leaves: differential roles of cryptochrome 1 and cryptochrome 2 and dual function of *SIG5* in the recognition of plastid promoters. *Plant J* **55**: 968-978
- Oravec A, Baumann A, Máté Z, Brzezinska A, Molinier J, Oakeley EJ, Adám E, Schäfer E, Nagy F, Ulm R** (2006) CONSTITUTIVELY PHOTOMORPHOGENIC1 is required for the UV-B response in Arabidopsis. *Plant Cell* **18**: 1975-1990
- Osuna D, Usadel B, Morcuende R, Gibon Y, Bläsing OE, Höhne M, Günter M, Kamlage B, Trethewey R, Scheible WR, Stitt M** (2007) Temporal responses of transcripts, enzyme activities and metabolites after adding sucrose to carbon-deprived Arabidopsis seedlings. *Plant J* **49**: 463-491
- Park DH, Somers DE, Kim YS, Choy YH, Lim HK, Soh MS, Kim HJ, Kay SA, Nam HG** (1999) Control of circadian rhythms and photoperiodic flowering by the Arabidopsis *GIGANTEA* gene. *Science* **285**: 1579-1582



- Peltier JB, Ytterberg AJ, Sun Q, van Wijk KJ** (2004) New functions of the thylakoid membrane proteome of *Arabidopsis thaliana* revealed by a simple, fast, and versatile fractionation strategy. *J Biol Chem* **279**: 49367-49383
- Rashotte AM, Carson SD, To JP, Kieber JJ** (2003) Expression profiling of cytokinin action in *Arabidopsis*. *Plant Physiol* **132**: 1998-2011
- Rossel JB, Wilson PB, Hussain D, Woo NS, Gordon MJ, Mewett OP, Howell KA, Whelan J, Kazan K, Pogson BJ** (2007) Systemic and intracellular responses to photooxidative stress in *Arabidopsis*. *Plant Cell* **19**: 4091-4110
- Ruckle ME, DeMarco SM, Larkin RM** (2007) Plastid signals remodel light signaling networks and are essential for efficient chloroplast biogenesis in *Arabidopsis*. *Plant Cell* **19**: 3944-3960
- Ryu JS, Kim JI, Kunkel T, Kim BC, Cho DS, Hong SH, Kim SH, Fernández AP, Kim Y, Alonso JM, Ecker JR, Nagy F, Lim PO, Song PS, Schäfer E, Nam HG** (2005) Phytochrome-specific type 5 phosphatase controls light signal flux by enhancing phytochrome stability and affinity for a signal transducer. *Cell* **120**: 395-406
- Sakai T, Wada T, Ishiguro S, Okada K** (2000) RPT2. A signal transducer of the phototropic response in *Arabidopsis*. *Plant Cell* **12**: 225-236
- Salter MG, Franklin KA, Whitelam GC** (2003) Gating of the rapid shade-avoidance response by the circadian clock in plants. *Nature* **426**: 680-683
- Scheible WR, Morcuende R, Czechowski T, Fritz C, Osuna D, Palacios-Rojas N, Schindelasch D, Thimm O, Udvardi MK, Stitt M** (2004) Genome-wide reprogramming of primary and secondary metabolism, protein synthesis, cellular growth processes, and the regulatory infrastructure of *Arabidopsis* in response to nitrogen. *Plant Physiol* **136**: 2483-2499
- Schindler U, Menkens AE, Beckmann H, Ecker JR, Cashmore AR** (1992) Heterodimerization between light-regulated and ubiquitously expressed *Arabidopsis* GBF bZIP proteins. *EMBO J* **11**: 1261-1273
- Schmid M, Uhlenhaut NH, Godard F, Demar M, Bressan R, Weigel D, Lohmann JU** (2003) Dissection of floral induction pathways using global expression analysis. *Development* **130**: 6001-6012

- Schult K, Meierhoff K, Paradies S, Töller T, Wolff P, Westhoff P** (2007) The nuclear-encoded factor HCF173 is involved in the initiation of translation of the *psbA* mRNA in *Arabidopsis thaliana*. *Plant Cell* **19**: 1329-1346
- Tepperman JM, Hudson ME, Khanna R, Zhu T, Chang SH, Wang X, Quail PH** (2004) Expression profiling of phyB mutant demonstrates substantial contribution of other phytochromes to red-light-regulated gene expression during seedling de-etiolation. *Plant J* **38**: 725-739
- Ulm R, Baumann A, Oravecz A, Máté Z, Adám E, Oakeley EJ, Schäfer E, Nagy F** (2004) Genome-wide analysis of gene expression reveals function of the bZIP transcription factor HY5 in the UV-B response of *Arabidopsis*. *Proc Natl Acad Sci USA* **101**: 1397-1402
- Wang H, Deng XW** (2002) *Arabidopsis* FHY3 defines a key phytochrome A signaling component directly interacting with its homologous partner FAR1. *EMBO J* **21**: 1339-1349
- Wang W, Yang D, Feldmann KA** (2011) *EFO1* and *EFO2*, encoding putative WD-domain proteins, have overlapping and distinct roles in the regulation of vegetative development and flowering of *Arabidopsis*. *J Exp Bot* **62**: 1077-1088
- Yadav V, Mallappa C, Gangappa SN, Bhatia S, Chattopadhyay S** (2005) A basic helix-loop-helix transcription factor in *Arabidopsis*, MYC2, acts as a repressor of blue light-mediated photomorphogenic growth. *Plant Cell* **17**: 1953-1966
- Yan Y, Stolz S, Chételat A, Reymond P, Pagni M, Dubugnon L, Farmer E** (2007) A downstream mediator in the growth repression limb of the jasmonate pathway. *Plant Cell* **19**: 2470-2483
- Zybailov B, Rutschow H, Friso G, Rudella A, Emanuelsson O, Sun Q, van Wijk KJ** (2008) Sorting signals, N-terminal modifications and abundance of the chloroplast proteome. *PLoS One* **3**: e1994
